# Supplementary material for: Shape deformation analysis reveals the temporal dynamics of cell-type-specific homeostatic and pathogenic responses to mutant huntingtin
Source: eLife. 2021 Feb 23;10:e64984. doi: 10.7554/eLife.64984 (PMC7901871; doi:10.7554/eLife.64984)
Supplement: Supplementary file 1. — Cellular assignments are based on matching whole-striatum gene expression dysregulation curves to cell-type-specific gene expression dysregulation curves in the striatum of Hdh model mice at 6 months of age using the cost distance, after linear interpolation (see Figure 1: step 1). Data are shown for each cell type with indication of p-values and FDR values. [file elife-64984-supp1.xlsx]

## Sheet: Drd2_MSN
Curve matching data				Assignment of whole-striatum gene deregulation to Drd2 neurons
Gene name	Weighted deformation distance	Deformation distance	Maximum LFC across CAG repeats	P value	FDR
Tbc1d8	3.715104	0.0019612981	0.69206758	0.00	0.00000000
Slc41a1	4.579453	0.0016819566	0.39555824	0.00	0.00000000
Brinp3	6.072571	0.0037065172	0.50256012	0.00	0.00000000
Fam117b	4.072721	0.0005050297	0.05178991	0.00	0.00000000
Cdk19	5.024748	0.0012754627	0.21075450	0.00	0.00000000
Gpr6	6.441903	0.0063026055	0.73238351	0.00	0.00000000
Ccm2	7.441380	0.0063335040	0.56946982	0.00	0.00000000
Usp22	7.652556	0.0018556124	0.06290761	0.00	0.00000000
Cdk5r1	5.401729	0.0012396168	0.15179491	0.00	0.00000000
Camk2b	3.075727	0.0009245324	0.48858347	0.00	0.00000000
Baiap2	6.279873	0.0041473589	0.52549833	0.00	0.00000000
Ppp1r1b	6.691375	0.0076552827	0.80757091	0.00	0.00000000
Ckb	6.101135	0.0024373802	0.30919098	0.00	0.00000000
Pou6f2	3.644132	0.0021148973	0.76197433	0.00	0.00000000
Vrk1	4.169226	0.0025347875	0.70757853	0.00	0.00000000
Nr2f1	7.462279	0.0064994475	0.58035566	0.00	0.00000000
Plk2	5.778214	0.0029306713	0.43689294	0.00	0.00000000
Slmap	5.866762	0.0034971050	0.50798912	0.00	0.00000000
Dzip1	7.539766	0.0040822255	0.34740427	0.00	0.00000000
Slitrk6	7.925760	0.0123875404	0.90427322	0.00	0.00000000
Rbfox1	7.722753	0.0041569792	0.33486598	0.00	0.00000000
Eif4a2	7.634550	0.0025049739	0.15556858	0.00	0.00000000
Faim2	6.807025	0.0038012197	0.40574126	0.00	0.00000000
Gpd1	7.077676	0.0040118316	0.39491272	0.00	0.00000000
Map6d1	6.558320	0.0033417513	0.38144343	0.00	0.00000000
Kcnj4	7.939127	0.0058463172	0.46309350	0.00	0.00000000
Sh3gl1	7.302013	0.0040111556	0.36734561	0.00	0.00000000
Clip4	6.861194	0.0026619428	0.25196853	0.00	0.00000000
Pja2	7.773903	0.0027463590	0.17412360	0.00	0.00000000
Mark2	5.641108	0.0019709069	0.28698891	0.00	0.00000000
Ppp1ca	7.011961	0.0051116855	0.51962991	0.00	0.00000000
Morn2	7.106385	0.0021765201	0.15649678	0.00	0.00000000
Pcdhb2	7.060131	0.0068343000	0.67093890	0.00	0.00000000
Sh3rf2	7.356606	0.0065417457	0.59943450	0.00	0.00000000
Mvb12b	7.675220	0.0023874498	0.13661415	0.00	0.00000000
Pdlim1	6.559837	0.0028270340	0.31053632	0.00	0.00000000
Chn1	3.787508	0.0016844560	0.58361808	0.00	0.00000000
Snph	6.050538	0.0017939019	0.20001180	0.00	0.00000000
Anxa5	5.443135	0.0017716570	0.27328702	0.00	0.00000000
Ppp3ca	3.109521	0.0010455127	0.53985100	0.00	0.00000000
Sptssb	5.760378	0.0023761869	0.34623178	0.00	0.00000000
Foxo1	7.028031	0.0052025431	0.52629967	0.00	0.00000000
Cxxc4	5.098297	0.0020859698	0.39583673	0.00	0.00000000
Penk	6.846631	0.0138482858	1.21878316	0.00	0.00000000
Pdp1	7.586918	0.0051648213	0.44724492	0.00	0.00000000
Rad23b	7.894653	0.0022302720	0.09819930	0.00	0.00000000
Phf24	6.746235	0.0025046370	0.24184115	0.00	0.00000000
Cdk2ap1	7.720885	0.0040544415	0.32470468	0.00	0.00000000
Mkrn1	4.742723	0.0011686552	0.22080116	0.00	0.00000000
Hipk4	7.623618	0.0161317379	1.16601712	0.00	0.00000000
C3ar1	7.652816	0.0023770637	0.13708760	0.00	0.00000000
Hras	7.214615	0.0052974826	0.50883842	0.00	0.00000000
Zfp710	7.237428	0.0029313760	0.24808600	0.00	0.00000000
Map2k7	6.539409	0.0016506480	0.12128197	0.00	0.00000000
Tmem25	6.976654	0.0035953612	0.35945690	0.00	0.00000000
Elavl3	7.111965	0.0021235952	0.14795710	0.00	0.00000000
C2cd2l	7.894483	0.0038945980	0.29051051	0.00	0.00000000
Sh3bgrl2	7.159194	0.0026681654	0.22150980	0.00	0.00000000
Htr1b	6.158860	0.0051698551	0.66745156	0.00	0.00000000
Tbl1x	5.558335	0.0012135511	0.12673559	0.00	0.00000000
Syp	4.922653	0.0019813445	0.40423392	0.00	0.00000000
Arpp21	3.863546	0.0031359436	0.94943249	0.00	0.00000000
Syn1	7.516741	0.0029363579	0.22089981	0.00	0.00000000
Laptm4a	7.873738	0.0027375723	0.16451049	0.00	0.02298149
Fam216b	5.065601	0.0015439144	0.27567656	0.00	0.02298149
Vps8	5.397336	0.0013124111	0.17120544	0.00	0.02298149
Pptc7	7.710338	0.0024117879	0.13693650	0.00	0.02510379
Clvs2	3.994450	0.0005021860	0.06101603	0.00	0.02579867
Epn3	5.084561	0.0020001501	0.37958510	0.02	0.02631316
Dnajc6	6.434119	0.0023643083	0.25572352	0.00	0.02675844
Arf4	5.288166	0.0010749837	0.12000594	0.01	0.02749916
Copz1	7.709974	0.0021622125	0.10310963	0.00	0.02762464
Dlg1	5.930996	0.0011581096	0.07378237	0.01	0.02762464
Tspan7	5.584198	0.0019117394	0.28298511	0.00	0.02836080
Ppp1cb	7.488114	0.0024118222	0.15584343	0.00	0.02862992
Cacul1	6.687487	0.0014410596	0.06764655	0.00	0.02870526
Smarcc1	7.156114	0.0020593853	0.13414940	0.00	0.02870526
Kazn	7.569263	0.0039770553	0.33315771	0.02	0.02969510
Zfp235	4.623912	0.0009443236	0.16458550	0.03	0.03224974
Kif1bp	6.450920	0.0015017348	0.10072399	0.01	0.03333514
Gdap1	6.827298	0.0014640891	0.06044742	0.03	0.04211354
Cs	6.329559	0.0013185413	0.07368494	0.02	0.04242982
Slc24a4	7.977536	0.0045654732	0.34698192	0.00	0.04363200
Cap2	1.977587	0.0002085276	0.23020739	0.00	0.04417570
Papola	6.371342	0.0015162009	0.11114946	0.02	0.04417570
Dnajc8	6.836182	0.0029614984	0.29605332	0.03	0.04417570
Vta1	7.979146	0.0022949092	0.10038019	0.01	0.04469135
Srr	7.600506	0.0024737760	0.15439151	0.05	0.04477567
Pdcd6	5.312076	0.0012784524	0.17309750	0.02	0.04505706
Sdcbp	7.409005	0.0021889573	0.13147880	0.01	0.04519029
Sdc3	5.541678	0.0009958004	0.06943597	0.01	0.04519029
Mapk10	7.608646	0.0021225620	0.10551210	0.04	0.04519029
Nfe2l1	5.789759	0.0014018892	0.14669029	0.01	0.04532125
Pmepa1	4.690964	0.0022806979	0.51805630	0.01	0.04570678
Csnk1d	7.934154	0.0021702273	0.08715395	0.00	0.04601892
Ldlrad4	7.352451	0.0037311940	0.33079095	0.01	0.04601892
Ube2t	7.388607	0.0048021426	0.43789657	0.01	0.04725836
Ncdn	7.565041	0.0021874680	0.11824354	0.02	0.04725836
Dis3l	7.123901	0.0024366878	0.19291832	0.02	0.04725836
Cinp	5.756584	0.0014606242	0.16390270	0.03	0.04958182
Pias1	5.201256	0.0010687743	0.12854274	0.05	0.05127089
Dhx40	7.952470	0.0027076345	0.15432421	0.02	0.05147490
Sp3	6.436983	0.0016990950	0.14036332	0.06	0.05333418
Ric8b	6.557011	0.0032600313	0.37077302	0.03	0.05371364
Cbx6	7.995949	0.0019991126	0.05917614	0.01	0.05474027
B4galnt4	6.508758	0.0018779715	0.16580400	0.05	0.05474027
Fam174a	5.497634	0.0011834720	0.12575330	0.05	0.05529197
Ctif	6.792407	0.0026096924	0.25209201	0.05	0.05556823
Gpkow	7.307337	0.0020256065	0.11591164	0.07	0.05556823
Cnst	5.024062	0.0016045336	0.29729566	0.01	0.05686635
D10Wsu102e	7.111279	0.0021946937	0.15877823	0.01	0.05749953
Smyd3	3.715252	0.0006086707	0.16405320	0.07	0.05749953
Gars	6.985525	0.0016015728	0.07289404	0.03	0.05787405
Atp1b1	7.311018	0.0024142868	0.17207316	0.01	0.05889584
Hgs	6.939685	0.0013616449	0.03173120	0.06	0.05889584
Arhgef2	4.454961	0.0011527480	0.26211990	0.04	0.05903919
Rmnd5a	6.516439	0.0015447944	0.10314960	0.06	0.06019868
Ccng2	6.950205	0.0031508937	0.30764272	0.02	0.06152017
Rcan3	4.627903	0.0009958838	0.18189905	0.02	0.06203974
Arpc2	5.715877	0.0013416353	0.14081754	0.01	0.06260920
Wac	6.583013	0.0014629694	0.08102243	0.03	0.06445464
Ppp2r2b	6.207577	0.0013283629	0.08713269	0.02	0.06474037
Porcn	7.592790	0.0028691798	0.20546832	0.07	0.06484825
Cd82	5.653504	0.0023708273	0.36125593	0.02	0.06495524
Pou3f1	7.736158	0.0038160458	0.29851200	0.02	0.06495524
Mapk4	3.066620	0.0009407261	0.50016500	0.05	0.06614268
Slc8a2	7.505077	0.0051489235	0.45609950	0.05	0.06707540
Add1	6.699675	0.0021271846	0.18841263	0.03	0.06730624
Fndc3a	7.108031	0.0017242237	0.08418107	0.04	0.06730624
Mapk1	4.679046	0.0011554595	0.22647399	0.07	0.06815234
Agps	4.248478	0.0005768111	0.06530574	0.03	0.06860377
Prickle2	4.217469	0.0009408975	0.22730952	0.03	0.06869199
Ahcyl1	4.080312	0.0007650063	0.17785858	0.07	0.06877951
Rragd	6.746727	0.0023409670	0.21714090	0.07	0.06932451
6030458C11Rik	5.884569	0.0012843619	0.10901651	0.07	0.07007057
Aars	7.654899	0.0027034827	0.17923852	0.05	0.07162337
Tspyl4	7.683679	0.0025071216	0.15165610	0.04	0.07431971
Psip1	5.544036	0.0014424428	0.18505150	0.03	0.07555753
Zhx1	5.809092	0.0013540777	0.13345170	0.06	0.07656452
Otx1	7.701342	0.0027959568	0.18659212	0.08	0.07656452
Kpna4	5.849269	0.0011303450	0.07478297	0.07	0.07731352
Dok7	6.247179	0.0015861540	0.13751250	0.03	0.07749911
Srxn1	4.505055	0.0006928518	0.08427879	0.01	0.07761523
Tfdp1	7.783603	0.0021552501	0.09644193	0.04	0.07766214
Chm	7.270776	0.0016039301	0.05082288	0.08	0.07791429
Actn2	4.021180	0.0014420885	0.44437060	0.03	0.07972313
Shb	6.026820	0.0034130064	0.46934940	0.05	0.07972313
Bscl2	5.944065	0.0021435702	0.27890642	0.01	0.08080000
Ube3a	2.280883	0.0003475518	0.31734758	0.06	0.08097104
Cwc22	5.688915	0.0011576175	0.09807146	0.02	0.08169778
Osbp2	6.621937	0.0028476081	0.30585156	0.03	0.08262281
Saraf	7.662281	0.0022823253	0.12349171	0.06	0.08485964
Cct8	4.935664	0.0008548555	0.09238058	0.02	0.08793508
Wdr82	7.178124	0.0015794171	0.05365279	0.05	0.08793508
Scamp1	7.134997	0.0016988822	0.07768063	0.02	0.08917950
Fbln1	7.897318	0.0022528068	0.10101089	0.03	0.09068942
Abi1	3.308512	0.0006378522	0.26335625	0.05	0.09068942
Prkcg	6.032521	0.0017515914	0.19377320	0.08	0.09068942
Foxo4	6.323819	0.0015804116	0.12864527	0.09	0.09124988
Cct2	7.926926	0.0022348421	0.09637392	0.04	0.09166621
Dnm1l	4.291291	0.0007952362	0.15714341	0.05	0.09456861
Uba1	3.160487	0.0004321750	0.15777258	0.06	0.09476953
Rnf44	6.704323	0.0020459680	0.17467480	0.03	0.09576964
Calm1	5.989418	0.0015466520	0.15661630	0.06	0.09930694
Lrp11	7.218454	0.0020458866	0.12660895	0.10	0.09992460
Cabp1	6.876945	0.0029901073	0.29514778	0.13	0.09992460

## Sheet: Drd1_MSN
Curve matching data				Assignment of whole striatum gene deregulation to Drd1 neurons
Gene name	Weighted deformation distance	Deformation distance	Maximum LFC across CAG repeats	P value	FDR
Hspa2	7.999616	2.939201e-03	0.17771255	0.00	0.00000000
Hcn1	7.998994	3.288853e-03	0.21694669	0.00	0.00000000
Ppp1r9b	7.988357	5.337627e-03	0.41456940	0.03	0.05086632
Chd6	7.985062	2.616303e-03	0.14056870	0.01	0.02675844
Nptx2	7.983440	5.393681e-03	0.41992537	0.00	0.00000000
Ssbp3	7.980269	2.552598e-03	0.13310199	0.04	0.07821071
Rhot2	7.975170	3.170243e-03	0.20600261	0.00	0.00000000
Dgcr2	7.970492	2.202885e-03	0.08885830	0.07	0.06106260
Cacng7	7.970346	3.141337e-03	0.20320193	0.00	0.00000000
Fkbp8	7.945828	2.731401e-03	0.15773900	0.10	0.08917405
Cct5	7.944278	2.062561e-03	0.07167472	0.00	0.04688395
Rnf123	7.943805	2.249329e-03	0.09703239	0.03	0.05474027
Emc8	7.939926	2.513837e-03	0.13146913	0.00	0.04505706
Wnk4	7.933521	9.359581e-03	0.71944512	0.00	0.00000000
Usp47	7.924507	2.295253e-03	0.10456510	0.00	0.00000000
Lmtk2	7.921655	3.188634e-03	0.21283069	0.00	0.00000000
Styk1	7.913354	4.216119e-03	0.32053258	0.01	0.04705995
Zfp235	7.912788	2.765418e-03	0.16458550	0.01	0.03189474
Otub2	7.908333	2.736146e-03	0.16143119	0.04	0.06484825
Rfwd3	7.905575	2.144797e-03	0.08581385	0.00	0.00000000
Fads1	7.902233	2.009031e-03	0.06720946	0.04	0.07419044
Opa1	7.898278	2.456070e-03	0.12746280	0.06	0.07007057
Lars	7.897408	2.769778e-03	0.16640448	0.01	0.06223079
Pigu	7.894520	2.023495e-03	0.06980381	0.00	0.02969510
Cbx6	7.893104	2.623875e-03	0.14896876	0.00	0.00000000
Luc7l3	7.889865	1.960180e-03	0.06114929	0.03	0.04409008
Marveld1	7.887275	2.298213e-03	0.10781040	0.07	0.08130374
Ugdh	7.883873	2.653514e-03	0.15338784	0.05	0.07821071
Zmym3	7.878720	3.045930e-03	0.20049380	0.00	0.00000000
Etnk1	7.877442	2.873458e-03	0.18048289	0.00	0.00000000
Spast	7.875732	2.066156e-03	0.07715248	0.00	0.00000000
Ralyl	7.874675	3.614744e-03	0.26349495	0.00	0.00000000
Snx12	7.872204	2.816159e-03	0.17411227	0.02	0.07292256
Pcdhb7	7.870595	3.440586e-03	0.24526140	0.00	0.00000000
Rnf112	7.863668	2.450288e-03	0.12948210	0.02	0.02862992
Numbl	7.862406	2.850465e-03	0.17905100	0.02	0.05650249
Grb10	7.861317	2.275204e-03	0.10675705	0.00	0.00000000
Calm3	7.856817	2.211753e-03	0.09857926	0.06	0.06707540
Zfp354c	7.854903	2.362692e-03	0.11881774	0.01	0.06536629
Bub3	7.853428	2.344535e-03	0.11655103	0.00	0.00000000
Stat5b	7.845395	2.053920e-03	0.07766625	0.00	0.00000000
Ppid	7.842555	2.044044e-03	0.07648442	0.00	0.00000000
Xpo7	7.841146	2.718946e-03	0.16499865	0.00	0.05945406
Mafg	7.840516	2.605195e-03	0.15099182	0.05	0.06484825
Rbfox1	7.838859	4.282913e-03	0.33486598	0.00	0.02862992
Ap3b2	7.834488	2.087419e-03	0.08316875	0.01	0.04470045
Ptpa	7.824297	2.378402e-03	0.12330029	0.00	0.00000000
Tti1	7.822496	2.065879e-03	0.08104148	0.01	0.02870526
Kat2b	7.813664	2.745656e-03	0.17060730	0.01	0.05556823
Arpp21	7.812573	1.282284e-02	0.94943249	0.00	0.00000000
Kcnh3	7.811847	6.517809e-03	0.53346811	0.00	0.00000000
Enpp6	7.810279	5.970108e-03	0.48929210	0.00	0.00000000
Isca1	7.809183	2.177289e-03	0.09751995	0.05	0.09276923
Plekha5	7.803172	3.773448e-03	0.28722343	0.00	0.03248660
Ppm1d	7.799947	3.534135e-03	0.26216660	0.05	0.04006277
Cacng5	7.798355	3.674686e-03	0.27733300	0.03	0.06328481
Brsk1	7.783090	2.127311e-03	0.09260243	0.00	0.00000000
Ap1g2	7.767023	2.758012e-03	0.17615070	0.00	0.02298149
Mras	7.760825	2.349097e-03	0.12451462	0.00	0.00000000
Man1b1	7.751881	2.342444e-03	0.12434914	0.01	0.04469135
Wdyhv1	7.749170	3.198869e-03	0.22986577	0.06	0.07217272
Cdk5r2	7.748250	3.211433e-03	0.23138462	0.00	0.00000000
Acot7	7.743684	2.776036e-03	0.18040100	0.09	0.09393000
Ttpal	7.743184	2.060740e-03	0.08626236	0.01	0.02862992
Ddi2	7.741479	3.027479e-03	0.21074962	0.00	0.03248660
Gpd1l	7.739609	2.187296e-03	0.10427520	0.01	0.05408550
Terf2	7.721086	1.968350e-03	0.07460942	0.01	0.04505706
Rnd2	7.719856	2.601503e-03	0.16069794	0.00	0.00000000
Csnk1g2	7.719022	2.292485e-03	0.12028448	0.03	0.07084470
Cbx5	7.708879	2.325108e-03	0.12550434	0.05	0.06286361
Ehhadh	7.705954	2.674438e-03	0.17110406	0.00	0.00000000
Sbk1	7.705000	3.442664e-03	0.26150838	0.06	0.07278771
Cnbp	7.691264	2.093955e-03	0.09495741	0.06	0.08377059
Farp2	7.685117	4.276691e-03	0.35094889	0.00	0.05426866
Cd53	7.683225	1.845770e-03	0.05917180	0.03	0.06445464
Wiz	7.675230	2.132992e-03	0.10173220	0.06	0.09393000
Zfp60	7.671731	2.021660e-03	0.08608504	0.01	0.06403019
Ik	7.670261	2.142577e-03	0.10347327	0.01	0.02742672
Gpr34	7.663107	1.943561e-03	0.07529968	0.04	0.09404391
Tspan33	7.660161	4.396446e-03	0.36559157	0.00	0.00000000
Pmepa1	7.658803	6.368678e-03	0.54199046	0.00	0.00000000
Galnt6	7.652395	3.165053e-03	0.23517907	0.06	0.05924732
Dok2	7.651153	3.417055e-03	0.26401010	0.08	0.08646053
Kcnh4	7.649324	9.578169e-03	0.77943490	0.00	0.00000000
Syn1	7.644341	2.635903e-03	0.17162160	0.00	0.00000000
Nphp1	7.638221	3.545308e-03	0.27953350	0.01	0.05333418
Rem2	7.632332	6.175292e-03	0.52960706	0.00	0.00000000
Smpd3	7.632293	5.173682e-03	0.44242070	0.00	0.00000000
Cops7b	7.628923	3.266638e-03	0.24918185	0.00	0.00000000
Map2k6	7.628652	2.830589e-03	0.19741395	0.00	0.00000000
Sugp1	7.624690	2.132269e-03	0.10561805	0.00	0.00000000
Nr1d1	7.623162	4.976393e-03	0.42538442	0.01	0.03494975
Tbc1d20	7.623038	3.825665e-03	0.31138201	0.01	0.04477567
Arsb	7.608799	2.812828e-03	0.19703641	0.01	0.06536629
Eml1	7.601377	3.097910e-03	0.23222089	0.03	0.05809241
Pkd1	7.598527	2.531647e-03	0.16217403	0.02	0.02749916
Kcng1	7.585064	4.083018e-03	0.34242520	0.00	0.00000000
F5	7.567831	1.809605e-03	0.06210886	0.00	0.05426866
Plxna2	7.564725	2.742304e-03	0.19225260	0.04	0.06932451
Stc1	7.563233	7.089152e-03	0.61324220	0.00	0.00000000
Mecp2	7.561859	1.887758e-03	0.07457212	0.04	0.07352950
Mul1	7.557120	1.673501e-03	0.04132325	0.00	0.03051643
Abcf1	7.554583	2.046709e-03	0.09884935	0.06	0.09564143
Arl4c	7.545391	3.119867e-03	0.24026336	0.00	0.00000000
Tpm1	7.540741	4.018835e-03	0.34069030	0.00	0.00000000
Lyst	7.531722	1.900450e-03	0.07880723	0.09	0.09616761
Zfp52	7.531343	3.208200e-03	0.25207002	0.00	0.00000000
Prkci	7.530002	3.193802e-03	0.25051416	0.02	0.02631316
Ppp2r2c	7.528940	2.836880e-03	0.20743516	0.00	0.00000000
Ptrh2	7.522257	2.170401e-03	0.11932960	0.05	0.05881765
Gpr12	7.520701	3.199152e-03	0.25207146	0.07	0.05889584
Cmtm4	7.519181	1.920686e-03	0.08285119	0.04	0.08147054
Timm22	7.517527	2.622619e-03	0.18122810	0.04	0.09033540
Ube2k	7.511306	1.719052e-03	0.05198721	0.01	0.04958182
Clasp1	7.501877	1.665407e-03	0.04398907	0.00	0.06152017
Yif1a	7.501130	2.463123e-03	0.16163181	0.06	0.07972313
Osbp2	7.500666	3.653505e-03	0.30585156	0.03	0.04477567
Ehbp1l1	7.497917	2.277424e-03	0.13647505	0.04	0.09576964
Wdr33	7.485516	2.114175e-03	0.11425510	0.02	0.08216105
Dnal4	7.476411	2.027546e-03	0.10227130	0.04	0.09145767
Folh1	7.471019	6.290810e-03	0.56163067	0.00	0.00000000
Srebf2	7.468815	2.776847e-03	0.20554437	0.06	0.06328481
Nrbp1	7.465111	1.869185e-03	0.07914838	0.00	0.00000000
Setx	7.458807	2.651301e-03	0.19033545	0.01	0.05458511
Jade2	7.457529	3.217144e-03	0.26057194	0.06	0.07134142
AA986860	7.452726	3.747307e-03	0.32138068	0.03	0.07005780
Fkbp15	7.451711	1.963929e-03	0.09471233	0.00	0.00000000
Cic	7.445684	2.301726e-03	0.14435046	0.03	0.05333418
Sh3rf2	7.443916	6.814420e-03	0.60895258	0.00	0.00000000
Gtf3c5	7.442008	1.837889e-03	0.07606243	0.02	0.05474027
Ublcp1	7.439638	2.790565e-03	0.21005868	0.02	0.05426866
Rps19bp1	7.439260	2.046056e-03	0.10803556	0.04	0.05383287
Rtn3	7.437155	1.948748e-03	0.09356867	0.05	0.09930694
Patz1	7.435160	1.771355e-03	0.06606005	0.03	0.06762960
Ap3s2	7.433279	1.873343e-03	0.08227516	0.01	0.04409008
Olfr1393	7.426561	3.901744e-03	0.34108830	0.00	0.00000000
Nrn1l	7.423470	1.010039e-02	0.85382399	0.00	0.00000000
Ppp2r2b	7.420072	1.804219e-03	0.07244861	0.03	0.08546656
Gtf2h2	7.408478	1.651148e-03	0.04848415	0.07	0.07581868
Dusp8	7.406412	2.030743e-03	0.10844255	0.03	0.08785550
Dnajb1	7.396318	1.661198e-03	0.05105516	0.02	0.02631316
Atp1a3	7.385986	2.592592e-03	0.18937987	0.04	0.07189831
Per1	7.385938	6.964634e-03	0.62990900	0.00	0.00000000
Cars	7.380971	2.029759e-03	0.11039186	0.02	0.07620163
Pabpc4	7.379236	2.397303e-03	0.16351396	0.00	0.00000000
Dcaf5	7.373041	1.975004e-03	0.10275017	0.02	0.04725836
Rnmt	7.363296	1.756114e-03	0.06912026	0.01	0.04505706
Appl2	7.362761	2.084123e-03	0.12004180	0.01	0.05809241
Tbl1x	7.361351	2.128549e-03	0.12673559	0.04	0.06286361
Rcan3	7.358760	2.517964e-03	0.18189905	0.03	0.05187609
Capza2	7.345849	1.708933e-03	0.06275640	0.08	0.08954965
Srsf6	7.344835	2.003541e-03	0.10942046	0.02	0.07373000
Hecw1	7.332081	1.831164e-03	0.08362831	0.02	0.04601892
Eef1e1	7.325497	2.222648e-03	0.14357367	0.02	0.05709421
Pptc7	7.324313	3.309861e-03	0.28548515	0.00	0.00000000
Fkbp2	7.308583	1.904948e-03	0.09718426	0.09	0.08830286
Nudt16	7.306654	2.254554e-03	0.14984801	0.00	0.00000000
Poldip3	7.298752	1.809583e-03	0.08282827	0.04	0.06178052
Stam	7.296372	1.754928e-03	0.07414650	0.04	0.07497591
Cdc42ep3	7.294229	3.900747e-03	0.35623800	0.08	0.09194163
Sema4f	7.291547	2.102126e-03	0.12879593	0.01	0.07133486
Btf3	7.288677	1.978593e-03	0.11028046	0.01	0.04446502
Ctnnb1	7.285614	1.832671e-03	0.08759223	0.00	0.00000000
Kif1a	7.284307	1.809979e-03	0.08404801	0.00	0.03333514
Atl3	7.284028	2.085405e-03	0.12693657	0.07	0.05819251
Nudt10	7.276460	2.483817e-03	0.18491960	0.00	0.00000000
Gpatch1	7.271004	2.457360e-03	0.18177335	0.01	0.04790514
N4bp1	7.270511	1.793188e-03	0.08243574	0.02	0.07392420
Arc	7.270133	7.772878e-03	0.71268660	0.00	0.00000000
Ormdl3	7.263648	1.910385e-03	0.10173560	0.03	0.06328481
Irf5	7.261638	1.531864e-03	0.03898356	0.00	0.03333514
Wdpcp	7.255202	2.774487e-03	0.22600875	0.05	0.04469135
Map3k11	7.255108	2.739350e-03	0.22140620	0.00	0.00000000
Tmem178b	7.254425	2.062423e-03	0.12601660	0.05	0.05474027
Adam22	7.249444	2.003252e-03	0.11739501	0.00	0.00000000
Gpr45	7.248393	3.756586e-03	0.34558042	0.00	0.00000000
Msl3	7.247628	2.326861e-03	0.16556329	0.04	0.08600032
Tubb4b	7.229546	2.081105e-03	0.13100970	0.00	0.00000000
Zmiz2	7.224968	1.839762e-03	0.09366974	0.00	0.00000000
Syn2	7.220225	1.579011e-03	0.05035365	0.03	0.04469135
Sesn1	7.214579	1.881473e-03	0.10122638	0.03	0.06691122
Imp3	7.210549	1.842143e-03	0.09524164	0.00	0.00000000
Bop1	7.204017	1.910887e-03	0.10679614	0.04	0.06932451
Zfp523	7.197397	2.346174e-03	0.17298391	0.04	0.05371364
Dennd4a	7.189368	1.682105e-03	0.07047401	0.05	0.07497591
Usf3	7.180738	1.926607e-03	0.11126220	0.02	0.05819251
Proz	7.177758	3.579380e-03	0.33351822	0.02	0.07700912
Synpo	7.176502	3.608818e-03	0.33708523	0.03	0.03224974
Rad23b	7.154937	1.716557e-03	0.07905970	0.00	0.00000000
Stard10	7.149858	3.858834e-03	0.36882161	0.00	0.00000000
Ehd3	7.148086	1.978399e-03	0.12225320	0.00	0.00000000
Aurkaip1	7.146668	2.111130e-03	0.14291546	0.05	0.08130374
Zscan22	7.143201	1.920559e-03	0.11350895	0.03	0.07900209
Hbegf	7.136400	6.652901e-03	0.64294764	0.00	0.00000000
Abcb10	7.136243	3.180904e-03	0.29032485	0.04	0.08100456
Mepce	7.133307	1.762003e-03	0.08845381	0.00	0.03248660
Akt2	7.130814	4.743565e-03	0.46585800	0.00	0.00000000
Pcdhb20	7.114078	3.330363e-03	0.31119853	0.00	0.00000000
H2afy2	7.112490	2.152356e-03	0.15228197	0.00	0.00000000
Cacna2d1	7.111091	2.770892e-03	0.24024176	0.03	0.09858542
Braf	7.103610	1.900791e-03	0.11374515	0.02	0.07972313
Pcdhb19	7.103601	4.178794e-03	0.41001161	0.00	0.00000000
Ldah	7.102414	2.000521e-03	0.12974625	0.07	0.09404391
Gzf1	7.100572	2.973097e-03	0.26791160	0.00	0.00000000
Polr1a	7.098721	1.604190e-03	0.06421920	0.00	0.04519029
Rasl10a	7.082373	6.306671e-03	0.62129872	0.00	0.00000000
Oprl1	7.067956	3.816974e-03	0.37410938	0.00	0.00000000
Pnkd	7.055420	1.654177e-03	0.07645865	0.02	0.06223079
Stx7	7.054809	1.964046e-03	0.12818942	0.09	0.09930694
Son	7.051614	1.758330e-03	0.09465039	0.03	0.07265210
Zfp646	7.038062	1.744939e-03	0.09352226	0.00	0.00000000
Dlg1	7.033216	1.928758e-03	0.12443166	0.07	0.09696000
Dab2ip	7.027835	2.603372e-03	0.22601669	0.00	0.00000000
Ptgr2	7.020234	1.660341e-03	0.08042631	0.00	0.00000000
Rragd	7.018581	4.032353e-03	0.40475288	0.03	0.03224974
Hnrnph3	7.016379	1.665111e-03	0.08157887	0.05	0.06740080
Wdr48	7.014097	1.919867e-03	0.12468888	0.12	0.09443802
Gtf2h1	7.009702	2.034787e-03	0.14351679	0.00	0.02862992
Fndc3a	7.006117	1.675135e-03	0.08418107	0.00	0.03248660
Chn1	7.005020	5.761974e-03	0.58361808	0.00	0.00000000
Cdip1	7.004182	1.603521e-03	0.07171535	0.03	0.06378277
Cacnb1	6.987607	3.307765e-03	0.32307393	0.00	0.00000000
Npc1	6.984575	2.045368e-03	0.14750890	0.05	0.07458462
Mrpl47	6.983829	1.341448e-03	0.02443696	0.03	0.08004164
Zfp653	6.975921	1.859698e-03	0.11818680	0.01	0.04601892
Acvrl1	6.964394	7.695399e-03	0.75959890	0.00	0.00000000
Fam160a2	6.960058	1.733536e-03	0.09820992	0.02	0.02957190
Eif4enif1	6.955130	1.850556e-03	0.11850873	0.09	0.09930694
Tgfbr1	6.951909	2.020368e-03	0.14656343	0.03	0.03224974
Slco2b1	6.949200	1.419851e-03	0.04223384	0.00	0.00000000
Pdcd6	6.945938	2.151281e-03	0.16775580	0.04	0.09068942
Tomm34	6.936036	1.650143e-03	0.08566522	0.02	0.08110606
Cacna1c	6.929145	2.498284e-03	0.22134197	0.00	0.00000000
Lrsam1	6.922792	2.164900e-03	0.17210570	0.05	0.08880952
Amt	6.922674	2.501212e-03	0.22243936	0.00	0.02870526
Golgb1	6.917025	1.953502e-03	0.13898038	0.03	0.04409008
Kpna4	6.916022	1.298604e-03	0.02105320	0.04	0.02675844
Cbx7	6.908923	1.860875e-03	0.12437888	0.02	0.02631316
Pank2	6.907421	1.582838e-03	0.07597325	0.02	0.04505706
Rims2	6.887824	1.262066e-03	0.01577358	0.00	0.00000000
Blcap	6.882367	2.222839e-03	0.18504039	0.05	0.07392420
Eftud2	6.881218	2.073430e-03	0.16172783	0.00	0.00000000
Asic4	6.879115	3.061154e-03	0.30428510	0.03	0.07761523
Slitrk3	6.872344	1.774389e-03	0.11294211	0.02	0.04386286
Ppp1r1b	6.863346	8.053826e-03	0.80757091	0.00	0.00000000
Adsl	6.858910	1.627869e-03	0.08824010	0.00	0.00000000
Zfp975	6.855611	2.079132e-03	0.16511210	0.00	0.04601892
Ddost	6.846674	1.676768e-03	0.09807671	0.02	0.02870526
Tnk2	6.843006	1.932089e-03	0.14234243	0.01	0.05580432
Kalrn	6.831052	3.222947e-03	0.33107270	0.00	0.00000000
Tmod2	6.822014	1.644842e-03	0.09449677	0.05	0.06997718
Ywhae	6.820122	1.599896e-03	0.08648065	0.00	0.00000000
Coro1c	6.816457	1.472169e-03	0.06288566	0.06	0.09930694
Dync1i1	6.815836	1.774781e-03	0.11809230	0.06	0.05597184
Rhoa	6.810043	1.541035e-03	0.07644309	0.03	0.04409008
Kctd1	6.809187	4.505772e-03	0.48580120	0.00	0.00000000
Zscan20	6.808001	2.365053e-03	0.21433315	0.01	0.03952174
Mdm4	6.798157	1.383607e-03	0.04716098	0.00	0.00000000
Smad3	6.796875	2.489483e-03	0.23408331	0.00	0.00000000
Nampt	6.793074	1.776695e-03	0.12049757	0.04	0.08169778
Numb	6.792126	2.758571e-03	0.27327923	0.07	0.09992460
Impg1	6.779985	7.476620e-03	0.77533390	0.00	0.00000000
Elmo2	6.778316	1.674662e-03	0.10372861	0.00	0.02870526
Sema4g	6.778006	3.783986e-03	0.40755471	0.00	0.00000000
Nrgn	6.777980	3.371333e-03	0.35664430	0.04	0.07719607
Lpin2	6.777899	2.173715e-03	0.18786975	0.01	0.02749916
Ptprr	6.776471	2.218886e-03	0.19512665	0.02	0.04725836
Tagln3	6.750992	2.523789e-03	0.24414734	0.05	0.07766214
Stat2	6.732297	1.592265e-03	0.09271299	0.02	0.05556823
Slitrk2	6.727066	2.306001e-03	0.21384511	0.00	0.00000000
Smg1	6.723467	1.400225e-03	0.05655185	0.00	0.00000000
Ube2z	6.721622	1.711649e-03	0.11550737	0.00	0.00000000
Cd99l2	6.719928	2.058463e-03	0.17516031	0.02	0.04930169
Atxn7	6.712226	2.151237e-03	0.19099921	0.02	0.08130374
Crem	6.705747	1.906441e-03	0.15112520	0.01	0.04469135
Senp2	6.699925	2.059834e-03	0.17740150	0.06	0.08954965
Zfp316	6.698641	2.421663e-03	0.23463256	0.06	0.08160000
Pcdhb8	6.685895	4.054780e-03	0.45241040	0.00	0.00000000
Map6d1	6.684136	3.471199e-03	0.38144343	0.00	0.00000000
Phtf1	6.677617	1.296929e-03	0.03930758	0.00	0.00000000
Kpnb1	6.669057	1.567987e-03	0.09375428	0.01	0.05711887
Uty	6.667026	1.368422e-03	0.05485291	0.03	0.07555753
Tgs1	6.665489	1.547412e-03	0.09016169	0.01	0.03248660
Polr2a	6.663967	5.052594e-03	0.56665591	0.01	0.04470045
2610008E11Rik	6.662860	1.603939e-03	0.10108138	0.09	0.09404391
Pdk1	6.654116	2.488350e-03	0.24966169	0.06	0.08192961
Slc35b4	6.650235	1.699497e-03	0.11990212	0.02	0.05383287
Ppp2r5e	6.649543	1.440888e-03	0.07085178	0.04	0.05597184
Stx6	6.641284	1.813978e-03	0.14130404	0.07	0.07007057
Scfd1	6.640956	1.854996e-03	0.14854620	0.04	0.04601892
Trpc7	6.634146	3.986687e-03	0.45174600	0.00	0.00000000
Med24	6.634110	1.433868e-03	0.07078408	0.03	0.05650249
Sv2a	6.625652	1.911356e-03	0.15984528	0.04	0.07989837
Tcerg1	6.624107	2.461115e-03	0.24892558	0.00	0.00000000
Ntm	6.623726	1.926250e-03	0.16260390	0.00	0.03333514
Ppp1r7	6.621071	1.558260e-03	0.09619971	0.03	0.06614268
Nrip2	6.619831	3.483576e-03	0.39159110	0.01	0.06954291
Tmem138	6.615446	1.941550e-03	0.16606270	0.06	0.04140000
Cyb561	6.611309	1.443936e-03	0.07476007	0.00	0.04491529
Hirip3	6.604808	2.687611e-03	0.28491570	0.06	0.09033540
Traf3	6.603058	1.669432e-03	0.11878416	0.10	0.06893399
Ralgps1	6.602318	1.441668e-03	0.07509049	0.02	0.05556823
Kazn	6.591068	3.015546e-03	0.33315771	0.04	0.04532125
Gm5148	6.584924	3.124292e-03	0.34883848	0.00	0.00000000
Cdkn2aip	6.579096	1.321325e-03	0.05250811	0.02	0.05597184
Sec22a	6.566317	1.667126e-03	0.12181678	0.02	0.03002801
Mas1	6.564892	1.529773e-02	1.38402200	0.00	0.00000000
Lmo2	6.561034	7.911136e-03	0.85564873	0.00	0.00000000
Mknk2	6.555189	2.616306e-03	0.28029539	0.00	0.00000000
Vim	6.547126	1.848013e-03	0.15660140	0.00	0.00000000
Ralgds	6.543686	1.595574e-03	0.11043020	0.03	0.05650249
Dhx33	6.540725	1.383921e-03	0.06876091	0.00	0.00000000
Emb	6.528918	2.284327e-03	0.23204526	0.02	0.05711887
Elk1	6.510605	1.554212e-03	0.10552740	0.05	0.06869199
Itfg2	6.485908	1.297683e-03	0.05540975	0.04	0.07005780
Rgmb	6.483502	1.282183e-03	0.05228759	0.10	0.09816933
Ell	6.480045	2.400092e-03	0.25602460	0.03	0.08947075
Rab8b	6.478294	1.580072e-03	0.11358925	0.02	0.06019868
Cdk10	6.476542	1.116547e-03	0.01593537	0.07	0.08501650
Mb21d2	6.470414	3.257980e-03	0.38214930	0.00	0.00000000
Tspan12	6.464006	1.453953e-03	0.08989328	0.01	0.02675844
Ttll1	6.463829	1.657332e-03	0.12981780	0.00	0.00000000
Obscn	6.457373	2.718970e-03	0.30750704	0.00	0.00000000
Zgrf1	6.454331	2.083043e-03	0.20712780	0.01	0.03142222
Cd55	6.452854	2.132499e-03	0.21563671	0.00	0.03189474
Atp6ap1	6.451258	1.898517e-03	0.17540284	0.00	0.00000000
Hdgf	6.448674	1.345701e-03	0.06885786	0.00	0.02749916
Gabrd	6.441092	5.197664e-03	0.61929510	0.00	0.00000000
Ints1	6.440159	1.292573e-03	0.05825281	0.02	0.04332754
Capns1	6.438762	1.727397e-03	0.14549617	0.06	0.08954965
Taf7	6.434691	2.030393e-03	0.20026496	0.00	0.03142222
Plxdc1	6.433724	2.685602e-03	0.30548670	0.00	0.00000000
Zfp281	6.423940	1.479870e-03	0.09883929	0.00	0.00000000
Atp1a1	6.422898	2.481227e-03	0.27553645	0.04	0.06403019
Elp2	6.421392	1.613802e-03	0.12559879	0.04	0.09033364
Zfp65	6.410353	1.575584e-03	0.11921120	0.02	0.06536629
Tbc1d30	6.409205	3.196201e-03	0.38208990	0.00	0.00000000
Slitrk1	6.406295	3.172472e-03	0.37920870	0.00	0.00000000
Zfp358	6.405586	1.792874e-03	0.16102208	0.05	0.07749911
Dhx37	6.404497	1.312903e-03	0.06575883	0.00	0.02895333
Ctcf	6.401604	1.473712e-03	0.09967709	0.00	0.03051643
Dip2b	6.398781	1.509124e-03	0.10710689	0.00	0.00000000
Mapk10	6.394438	1.363978e-03	0.07756561	0.00	0.03142222
Slc41a2	6.391253	1.331959e-03	0.07103066	0.00	0.00000000
Zeb1	6.371190	1.984270e-03	0.19916524	0.00	0.00000000
Aida	6.369924	1.844343e-03	0.17419660	0.00	0.00000000
Qsox2	6.366892	1.442952e-03	0.09662099	0.00	0.02870526
Gna13	6.357405	1.422345e-03	0.09322922	0.06	0.08485964
Dnajb6	6.356607	1.283832e-03	0.06367497	0.07	0.08501650
Zyx	6.343964	3.771245e-03	0.46801409	0.00	0.00000000
Nolc1	6.343042	1.686619e-03	0.14745685	0.00	0.00000000
Stk38l	6.336214	1.926074e-03	0.19263865	0.00	0.00000000
Rab15	6.330514	3.053440e-03	0.37288248	0.00	0.00000000
Mvb12b	6.328514	1.153677e-03	0.03671078	0.02	0.05903919
Hsd17b4	6.326057	1.567051e-03	0.12576105	0.03	0.04417570
Nfx1	6.324461	1.878345e-03	0.18527390	0.00	0.00000000
Pfkfb4	6.319475	1.723265e-03	0.15689360	0.04	0.03666555
Smad4	6.310569	1.954606e-03	0.20058549	0.07	0.09858542
Tulp4	6.309811	1.419768e-03	0.09716230	0.03	0.06691122
Pdcl	6.303956	1.455390e-03	0.10516880	0.04	0.07162337
Gtf2a1	6.303865	1.845390e-03	0.18145493	0.02	0.06614268
Ppp1r16b	6.302373	5.159107e-03	0.63968067	0.00	0.00000000
Gsr	6.291874	1.604510e-03	0.13663593	0.03	0.05474027
Myt1	6.289469	1.468660e-03	0.10932170	0.04	0.06323478
Abi1	6.288927	2.304664e-03	0.26335625	0.05	0.09068942
Usp13	6.280040	1.745373e-03	0.16524510	0.08	0.09283404
Vstm2a	6.277214	2.416444e-03	0.28310761	0.00	0.00000000
Rasgef1a	6.273584	4.706160e-03	0.59349714	0.00	0.00000000
Polr3k	6.267621	1.264760e-03	0.06741570	0.07	0.08600032
Zer1	6.266236	1.227609e-03	0.05914355	0.05	0.05819251
Baiap2	6.266190	4.129305e-03	0.52549833	0.00	0.00000000
Lancl1	6.266185	1.242240e-03	0.06247020	0.01	0.04172459
Slc6a6	6.265916	2.332871e-03	0.27083400	0.07	0.08954965
Ptp4a3	6.259214	1.608002e-03	0.14065400	0.00	0.02895333
Ppm1g	6.258892	1.500439e-03	0.11888753	0.03	0.05359288
Dcx	6.257911	3.408864e-03	0.43298665	0.00	0.00000000
Lipe	6.257291	2.644217e-03	0.32179247	0.00	0.00000000
Msra	6.255627	1.883915e-03	0.19384070	0.10	0.08947075
Chtop	6.253983	1.326806e-03	0.08243450	0.00	0.02749916
Srf	6.247806	3.225620e-03	0.40903174	0.00	0.00000000
Rabif	6.244421	1.547720e-03	0.13001950	0.03	0.06860377
Gpkow	6.237612	1.475956e-03	0.11591164	0.01	0.02762464
Usp48	6.224196	1.583887e-03	0.13940904	0.02	0.02870526
Igfbp6	6.223818	3.033292e-03	0.38491230	0.00	0.00000000
Ankfy1	6.222093	1.354031e-03	0.09139524	0.01	0.04688395
Atmin	6.219852	1.257866e-03	0.07021313	0.01	0.02796923
Papola	6.217119	1.443688e-03	0.11114946	0.05	0.08562194
Slc36a4	6.214340	1.844014e-03	0.19101440	0.06	0.06323478
Msmo1	6.206203	2.918163e-03	0.37041979	0.01	0.02895333
Hcn3	6.189163	2.436036e-03	0.29746193	0.00	0.00000000
Arhgef2	6.181497	2.020811e-03	0.22722570	0.10	0.08354178
Gga1	6.172223	1.703451e-03	0.16868740	0.06	0.07766214
Stk38	6.168082	1.291146e-03	0.08255591	0.00	0.00000000
Slc25a25	6.161387	3.804115e-03	0.50103280	0.00	0.00000000
Ogfod1	6.144463	1.775342e-03	0.18573617	0.04	0.08130374
Dusp12	6.138151	1.995751e-03	0.22780590	0.02	0.04505706
Pou6f2	6.127587	5.979708e-03	0.76197433	0.00	0.00000000
Lpcat4	6.115616	3.662839e-03	0.48962053	0.00	0.00000000
Ino80	6.087950	1.506745e-03	0.13760073	0.01	0.02796923
Setd3	6.084338	1.310838e-03	0.09506060	0.01	0.04386286
Exoc2	6.078120	1.149933e-03	0.05791363	0.02	0.06456449
Tubb5	6.076418	1.136364e-03	0.05476750	0.01	0.04725836
Eif4g3	6.076126	1.126740e-03	0.05244004	0.00	0.02749916
Psmc4	6.075564	1.073996e-03	0.03940462	0.06	0.08130374
Rapgef1	6.074651	1.279579e-03	0.08886029	0.00	0.04040000
Zkscan14	6.070434	1.475192e-03	0.13270986	0.01	0.03494975
Rab7	6.069800	1.152747e-03	0.05936164	0.02	0.04446502
Tmod1	6.068080	3.598187e-03	0.48853161	0.01	0.09753161
Eml4	6.067441	1.285789e-03	0.09098889	0.03	0.06474037
Polr3b	6.063780	1.451360e-03	0.12826678	0.00	0.04639556
St3gal2	6.062708	1.808106e-03	0.20136706	0.00	0.00000000
Ppp1r1a	6.059147	5.112926e-03	0.68011220	0.01	0.02870526
Fn3k	6.058881	1.793278e-03	0.19892626	0.09	0.06869199
Cog6	6.056652	1.164711e-03	0.06347737	0.00	0.00000000
C2cd2l	6.043011	2.282034e-03	0.29051051	0.00	0.00000000
Cep68	6.041448	1.317343e-03	0.10077030	0.02	0.04601892
Tbpl1	6.034286	1.578803e-03	0.15847310	0.09	0.08130374
Snx16	6.029204	1.874752e-03	0.21814460	0.04	0.06982813
Zfp9	6.026764	1.581335e-03	0.15982341	0.02	0.03002801
Sntb2	6.016354	3.478756e-03	0.48034438	0.00	0.00000000
Gdap1	6.008158	1.133842e-03	0.06044742	0.02	0.06152017
Phlpp2	6.002330	2.031543e-03	0.25091895	0.00	0.00000000
Atat1	5.995027	1.765597e-03	0.20089759	0.00	0.00000000
Trip12	5.989218	1.278983e-03	0.09712082	0.03	0.07839229
Rin1	5.989028	3.721905e-03	0.51865299	0.08	0.08646053
Frmd4a	5.981307	1.259394e-03	0.09331427	0.08	0.08160000
Map3k10	5.978125	1.359511e-03	0.11677442	0.06	0.09437779
Dmap1	5.973131	1.319641e-03	0.10817125	0.00	0.02675844
Rabepk	5.965738	1.556004e-03	0.16121272	0.05	0.06893399
Usp46	5.965071	1.573453e-03	0.16498412	0.01	0.04446502
Cd4	5.964212	6.240588e-03	0.82452350	0.00	0.00000000
Git1	5.963461	3.264348e-03	0.45807567	0.00	0.02298149
Nsun7	5.962922	3.476400e-03	0.48879392	0.00	0.00000000
Angel2	5.961332	1.333385e-03	0.11253990	0.07	0.08954965
Zdhhc20	5.952414	1.238623e-03	0.09125706	0.05	0.07839229
Zwint	5.946779	1.120351e-03	0.06285342	0.08	0.09708550
Rab5c	5.943436	1.140823e-03	0.06829188	0.02	0.04417570
Trappc13	5.942482	1.071144e-03	0.05075189	0.01	0.04505706
Srxn1	5.931031	1.270435e-03	0.10096064	0.00	0.00000000
Ing4	5.930883	1.286550e-03	0.10477530	0.02	0.03002801
Gpr85	5.919248	2.130041e-03	0.27969994	0.00	0.00000000
Foxp4	5.913003	1.979722e-03	0.25247820	0.00	0.00000000
Dusp6	5.902420	3.920867e-03	0.56086708	0.00	0.00000000
Mapk4	5.899384	3.671570e-03	0.52711542	0.00	0.00000000
Uchl5	5.891801	1.276630e-03	0.10643518	0.04	0.09404391
Birc6	5.889910	1.295935e-03	0.11119954	0.00	0.00000000
Tmem80	5.883469	1.530891e-03	0.16502601	0.00	0.00000000
Pitpnm2	5.882765	3.122896e-03	0.44994248	0.00	0.00000000
Timp2	5.881501	2.261816e-03	0.30861244	0.00	0.00000000
Tm9sf4	5.881388	1.401573e-03	0.13654346	0.00	0.00000000
Chtf18	5.867419	3.175945e-03	0.46048230	0.00	0.02969510
Bnip3	5.867297	1.320207e-03	0.11927420	0.04	0.05709421
Cbx4	5.846454	4.193316e-03	0.60760847	0.00	0.00000000
Rab40b	5.831365	2.398726e-03	0.33988558	0.04	0.06328481
Slc45a4	5.828364	1.155034e-03	0.08311024	0.03	0.07141530
Dnajc2	5.797752	2.495631e-03	0.36164930	0.02	0.03002801
Asns	5.796968	1.158149e-03	0.08705832	0.01	0.04725836
Otulin	5.779501	1.087032e-03	0.07046747	0.02	0.05147490
Jade1	5.779336	1.246242e-03	0.11083407	0.03	0.05709421
Arhgef3	5.777315	1.605433e-03	0.19353780	0.05	0.06484825
Raly	5.776331	1.680102e-03	0.20960348	0.00	0.00000000
Uhmk1	5.775973	9.669591e-04	0.03836762	0.01	0.06877951
Eif1ax	5.760959	1.285672e-03	0.12240114	0.01	0.02895333
Rapgef6	5.760765	1.000964e-03	0.04919827	0.03	0.05787405
Dis3l	5.747056	1.585824e-03	0.19291832	0.02	0.04725836
Ap1s1	5.741728	3.000870e-03	0.45407150	0.00	0.02969510
Isg20l2	5.726581	1.178744e-03	0.09953472	0.00	0.03248660
Jmjd4	5.704970	1.282851e-03	0.12781930	0.00	0.00000000
Slc25a37	5.699031	1.801527e-03	0.24476507	0.11	0.09870655
Rabggta	5.689723	1.290213e-03	0.13130563	0.01	0.05972564
Zfp592	5.679670	1.021814e-03	0.06281120	0.02	0.07766214
Ppp2r3a	5.657011	1.660726e-03	0.22038065	0.08	0.09131889
Inpp5b	5.645940	1.007628e-03	0.06222975	0.02	0.04332754
Tspyl2	5.636323	1.170873e-03	0.10709824	0.09	0.09829187
Ttyh3	5.629535	1.812033e-03	0.25615447	0.04	0.06006253
Kif1bp	5.621376	1.006682e-03	0.06442146	0.00	0.00000000
E130308A19Rik	5.616472	1.676906e-03	0.22910620	0.04	0.04705995
Dnajc18	5.603710	1.125281e-03	0.09862509	0.03	0.07028440
Vps52	5.600118	1.135698e-03	0.10177502	0.00	0.00000000
Rpa1	5.599109	1.192639e-03	0.11678741	0.04	0.06526154
Tyro3	5.591223	2.021186e-03	0.30407457	0.00	0.03189474
Racgap1	5.581496	1.851539e-03	0.27093154	0.00	0.00000000
Actb	5.580949	1.068149e-03	0.08560917	0.09	0.08902726
Zfp277	5.576559	9.663222e-04	0.05743555	0.02	0.06178052
Smyd3	5.571731	1.508812e-03	0.19715207	0.00	0.02579867
Cfap206	5.571319	3.092381e-03	0.49813310	0.00	0.00000000
Acat1	5.570566	1.067820e-03	0.08661030	0.04	0.08130374
P4ha1	5.565304	2.986469e-03	0.48195167	0.00	0.00000000
Wac	5.564151	1.045162e-03	0.08102243	0.00	0.00000000
Pign	5.561474	1.202470e-03	0.12351549	0.06	0.09930694
Nipsnap1	5.553308	1.259165e-03	0.13898340	0.03	0.05945406
Ube2g2	5.540833	1.798058e-03	0.26529136	0.00	0.00000000
Hmgcr	5.537669	1.244715e-03	0.13710060	0.00	0.00000000
Ppp2r5a	5.535880	1.168708e-03	0.11754172	0.03	0.07007057
Tpm2	5.527412	3.535787e-03	0.57577432	0.02	0.04242982
Brms1	5.516998	2.537580e-03	0.41307627	0.08	0.07141530
Insr	5.492296	1.136026e-03	0.11367750	0.06	0.07134142
Nap1l4	5.490115	9.813820e-04	0.07060769	0.01	0.02836080
Ssbp4	5.487902	2.197118e-03	0.35412278	0.00	0.00000000
Dlg4	5.479270	2.048552e-03	0.32603950	0.00	0.04172459
Tada2a	5.478033	1.082955e-03	0.10073186	0.02	0.05408550
Alkbh8	5.471167	1.085320e-03	0.10214211	0.15	0.09068942
Sec23a	5.470695	9.060865e-04	0.05022755	0.00	0.00000000
Pcdhb17	5.470431	1.849356e-03	0.28611981	0.00	0.00000000
Plpp1	5.461184	1.333706e-03	0.16871830	0.00	0.00000000
Hipk4	5.451108	7.980701e-03	1.13883700	0.00	0.00000000
Myo5a	5.444877	9.777354e-04	0.07427853	0.00	0.03333514
Gramd1a	5.441098	1.175933e-03	0.13023830	0.05	0.05853878
Rab39b	5.438369	8.246828e-04	0.02804970	0.00	0.04725836
Chst10	5.438101	8.958842e-04	0.05040033	0.06	0.09124988
Slc35e4	5.436264	1.425461e-03	0.19450787	0.04	0.07719607
Klf9	5.430149	1.500103e-03	0.21326154	0.03	0.05359288
Stk26	5.423931	3.094226e-03	0.52556197	0.00	0.00000000
Enah	5.410717	1.805594e-03	0.28533542	0.01	0.05924732
Mtmr7	5.396982	9.626666e-04	0.07489293	0.06	0.06323478
Nsun2	5.390909	9.309033e-04	0.06596597	0.05	0.05787405
Spata2l	5.385988	3.488540e-03	0.59662065	0.00	0.00000000
Hpca	5.384690	4.536133e-03	0.75078370	0.00	0.00000000
Cdk8	5.359850	1.450984e-03	0.21068758	0.05	0.09544161
Kcna1	5.358742	1.253429e-03	0.16067372	0.03	0.06614268
Dctn3	5.355046	9.875542e-04	0.08683665	0.00	0.00000000
Dhx57	5.354765	9.835961e-04	0.08569028	0.00	0.00000000
Sec23b	5.351617	1.387997e-03	0.19616014	0.07	0.08160000
Pspc1	5.349259	1.200968e-03	0.14784638	0.02	0.02969510
Slc9a1	5.346945	1.277109e-03	0.16835670	0.03	0.05720979
Bap1	5.336980	1.249075e-03	0.16221454	0.07	0.06019868
Dusp14	5.330490	5.478492e-03	0.88855604	0.00	0.00000000
Shb	5.330146	2.301090e-03	0.39996940	0.05	0.06260920
Fam110b	5.322197	1.579174e-03	0.24666196	0.05	0.08239212
Arhgap10	5.307175	2.484073e-03	0.43911500	0.01	0.02510379
Dmd	5.300126	9.169875e-04	0.07134112	0.02	0.05580432
Samhd1	5.282706	1.165674e-03	0.14629699	0.01	0.07005780
Fancb	5.275345	2.660091e-03	0.47768140	0.09	0.09772754
Rbm43	5.266999	1.701767e-03	0.28322554	0.02	0.04725836
Chl1	5.245680	2.003855e-03	0.35335827	0.00	0.00000000
Pdha1	5.233176	1.161610e-03	0.15127565	0.00	0.00000000
Slc35e3	5.231805	1.347715e-03	0.20169356	0.06	0.08160000
Brk1	5.231054	1.172903e-03	0.15469920	0.01	0.05556823
Nxt2	5.226807	9.083439e-04	0.07661868	0.11	0.08076562
Mttp	5.214968	1.698933e-03	0.29038107	0.01	0.05787405
Hectd3	5.213264	8.682920e-04	0.06522742	0.03	0.04725836
Mgrn1	5.208327	8.225011e-04	0.05064281	0.01	0.02836080
Dnm1l	5.204302	1.169621e-03	0.15714341	0.07	0.08830286
Smad1	5.196542	1.071580e-03	0.12993808	0.09	0.09930694
Mcrs1	5.192696	9.311259e-04	0.08763994	0.06	0.09111025
Ube2e1	5.183677	1.057881e-03	0.12745186	0.02	0.04519029
Ptp4a2	5.177298	1.412931e-03	0.22603446	0.00	0.00000000
Ppat	5.159078	9.741088e-04	0.10496690	0.02	0.06908756
Kansl1l	5.158001	1.026043e-03	0.12101388	0.00	0.00000000
Wnk1	5.156074	9.891265e-04	0.10996760	0.01	0.04532125
Trap1	5.153801	8.902050e-04	0.07891840	0.04	0.09404391
Atg101	5.153451	1.201941e-03	0.17273416	0.02	0.06762960
Wbp4	5.152003	9.147431e-04	0.08704783	0.03	0.07656452
Gga3	5.149009	1.192133e-03	0.17056184	0.00	0.00000000
Lrrc10b	5.147212	5.021288e-03	0.87668790	0.00	0.00000000
Pphln1	5.143713	9.969804e-04	0.11385608	0.07	0.07964571
E2f6	5.140634	1.293790e-03	0.19970546	0.00	0.00000000
Idh3a	5.136985	1.224949e-03	0.18131912	0.01	0.05371364
Zdhhc18	5.113936	1.899141e-03	0.35216413	0.01	0.02762464
Daam1	5.110796	1.092110e-03	0.14661349	0.10	0.09019095
Ccar1	5.109380	1.251297e-03	0.19232808	0.02	0.03002801
Eif4g2	5.090319	8.209691e-04	0.06288335	0.00	0.00000000
Clip4	5.087568	1.463591e-03	0.25196853	0.04	0.07731352
Stx16	5.079767	8.221854e-04	0.06447031	0.02	0.02969510
Ssh1	5.066168	1.352597e-03	0.22594652	0.12	0.07292256
Rpusd1	5.063839	1.300169e-03	0.21206569	0.03	0.08130374
Tomm20	5.063837	1.157859e-03	0.17196740	0.03	0.04761429
Rnf185	5.048302	1.033842e-03	0.13691545	0.03	0.05720979
Cln8	5.034890	1.022637e-03	0.13514195	0.00	0.04469135
Slc24a4	5.023520	1.810358e-03	0.34698192	0.05	0.08097104
Pgr	5.019286	9.296685e-04	0.10746625	0.00	0.00000000
Mpp6	5.006213	1.174905e-03	0.18468703	0.04	0.06445464
Calm1	4.999478	1.359987e-03	0.23763696	0.04	0.05383287
Cdc5l	4.992992	7.621000e-04	0.05289810	0.00	0.00000000
Uba2	4.987925	8.398435e-04	0.08100423	0.05	0.08021499
Dhdds	4.985284	1.023199e-03	0.14163823	0.00	0.03248660
Armcx5	4.974052	1.268276e-03	0.21597277	0.01	0.02762464
Nfe2l3	4.951394	2.373142e-03	0.48386239	0.00	0.00000000
Tpcn1	4.947963	8.002811e-04	0.07173505	0.04	0.09194163
Trim8	4.945344	7.536508e-04	0.05512218	0.00	0.04505706
Zfp248	4.938605	8.946617e-04	0.10565470	0.01	0.03051643
Rab18	4.933448	8.511504e-04	0.09136091	0.00	0.04930169
Morf4l2	4.919789	1.265577e-03	0.22309920	0.00	0.00000000
Bag5	4.912221	1.237741e-03	0.21620430	0.02	0.03721409
Dazap1	4.899757	8.561590e-04	0.09717643	0.06	0.07632324
Ahcyl1	4.885500	1.096721e-03	0.17785858	0.02	0.05458511
Tbc1d1	4.884075	1.413470e-03	0.26976993	0.00	0.00000000
Ccnk	4.879322	1.346000e-03	0.25190531	0.00	0.00000000
Atr	4.871071	9.639675e-04	0.13739221	0.04	0.08932535
Slit2	4.855361	2.170888e-03	0.45961530	0.06	0.07857323
Wars	4.854854	7.608086e-04	0.06814803	0.00	0.00000000
Rgs14	4.836939	5.825212e-03	1.07792104	0.00	0.00000000
Gda	4.830001	8.109145e-04	0.08957663	0.01	0.07386150
Map3k7	4.765050	8.060081e-04	0.09580238	0.05	0.05819251
Stx3	4.755140	1.205328e-03	0.23011167	0.00	0.02836080
Fam76a	4.752325	1.038936e-03	0.17824762	0.07	0.09777928
Gnl1	4.745058	1.144537e-03	0.21297353	0.00	0.00000000
Taf10	4.742077	6.684745e-04	0.04522252	0.03	0.09131889
Noct	4.737689	8.401608e-04	0.11180738	0.07	0.08932535
Arl3	4.732168	1.068329e-03	0.19070470	0.03	0.06877951
Phc3	4.728270	7.341635e-04	0.07305213	0.05	0.05498341
Slc8a2	4.726896	2.044350e-03	0.45653651	0.09	0.08917950
Rrm2b	4.672503	1.017148e-03	0.18256250	0.07	0.09424643
Erf	4.663765	1.707676e-03	0.38606605	0.00	0.00000000
Ndufb10	4.662091	6.316060e-04	0.03906651	0.02	0.04601892
Rab35	4.642580	7.763018e-04	0.10014455	0.00	0.00000000
Arl5a	4.627883	1.141708e-03	0.23012130	0.00	0.04363200
Spag9	4.620114	6.388996e-04	0.04709609	0.00	0.00000000
Ilf3	4.618939	7.256193e-04	0.08319281	0.01	0.06328481
Epn3	4.612434	1.126577e-03	0.22769650	0.00	0.02631316
Plk2	4.610474	1.865826e-03	0.43689294	0.00	0.00000000
Copg2	4.610328	6.609842e-04	0.05765260	0.00	0.00000000
Pla2g3	4.603546	1.150711e-03	0.23686980	0.00	0.02762464
Zfp329	4.591767	1.126377e-03	0.23090700	0.03	0.05227625
2010300C02Rik	4.589408	1.833405e-03	0.43298046	0.02	0.06079869
Tanc1	4.589198	1.639954e-03	0.38242746	0.04	0.04505706
Dcaf7	4.581269	7.788387e-04	0.10916926	0.04	0.04532125
Nup88	4.580095	8.869123e-04	0.15022830	0.00	0.00000000
Tmed2	4.564922	5.734956e-04	0.02460403	0.08	0.07265178
Tesk2	4.544404	7.931087e-04	0.11971130	0.03	0.08000445
Tesc	4.517864	2.466038e-03	0.59917470	0.00	0.00000000
Tmcc1	4.512882	6.638567e-04	0.07093045	0.00	0.00000000
Ppa1	4.512844	6.574303e-04	0.06816511	0.01	0.04688395
Jph3	4.505879	8.959124e-04	0.16428312	0.03	0.07964571
Tfdp2	4.501555	9.765240e-04	0.19419086	0.02	0.07265178
Pomt1	4.499235	1.346793e-03	0.31566488	0.00	0.00000000
Rgs19	4.464584	2.144342e-03	0.53720836	0.00	0.00000000
Nphp4	4.460405	1.581596e-03	0.39160713	0.00	0.00000000
Rif1	4.450467	8.406232e-04	0.15147103	0.00	0.05359288
Zmym6	4.439876	7.799098e-04	0.12900093	0.02	0.04470045
Map2k7	4.426938	7.564573e-04	0.12128197	0.02	0.05889584
Grm8	4.426532	1.122428e-03	0.25686000	0.00	0.00000000
Cnpy4	4.422679	1.089030e-03	0.24616425	0.07	0.09916364
Gmpr2	4.393963	7.732411e-04	0.13285043	0.00	0.00000000
Dck	4.381884	7.108699e-04	0.10846300	0.02	0.02870526
Nol12	4.334588	6.868308e-04	0.10461240	0.07	0.09858542
Camkv	4.328782	2.016424e-03	0.53734990	0.00	0.00000000
Cacul1	4.301458	5.961936e-04	0.06764655	0.00	0.04725836
Rab14	4.299976	5.108529e-04	0.02563210	0.00	0.00000000
Vcp	4.280148	6.417224e-04	0.09185430	0.03	0.08712460
Rnf26	4.267132	8.814016e-04	0.19574626	0.00	0.00000000
Extl1	4.254799	1.081263e-03	0.27283466	0.01	0.05046070
Pcp4	4.245581	2.418621e-03	0.65836870	0.00	0.00000000
L3mbtl3	4.225297	1.260283e-03	0.34018860	0.00	0.00000000
Cnnm1	4.218521	6.594528e-04	0.10873970	0.00	0.00000000
Fyn	4.218491	5.350833e-04	0.04834460	0.12	0.06844661
Kcnt1	4.201092	1.534188e-03	0.43234600	0.07	0.07929070
H13	4.195135	7.550581e-04	0.15500445	0.01	0.04688395
Fam117b	4.174820	4.911785e-04	0.03086229	0.00	0.00000000
Adprh	4.159817	7.457435e-04	0.15647847	0.05	0.06932451
Slc25a46	4.128010	6.557692e-04	0.12034708	0.07	0.06893399
Mrfap1	4.124493	5.358206e-04	0.06122767	0.00	0.00000000
Eif4a2	4.071110	7.122985e-04	0.15556858	0.00	0.00000000
Ackr1	4.062000	1.133813e-03	0.32895465	0.00	0.00000000
Wdr82	4.024432	4.964598e-04	0.05365279	0.01	0.04363200
Snx4	4.018232	7.440509e-04	0.17883831	0.03	0.06427657
Anapc2	3.972972	6.417128e-04	0.13760960	0.05	0.09283404
Snx10	3.944721	6.332894e-04	0.13794730	0.07	0.08130374
Faxc	3.937599	5.891866e-04	0.11644590	0.08	0.08000445
Vps45	3.931230	5.542751e-04	0.09887238	0.03	0.06026740
Speg	3.928187	7.803658e-04	0.21114306	0.00	0.00000000
Rab2b	3.882154	5.955264e-04	0.12860494	0.00	0.00000000
Frat2	3.871027	1.343040e-03	0.44671290	0.06	0.08004164
Rcc2	3.865698	6.492803e-04	0.15915591	0.08	0.09033364
Rfng	3.858628	4.062281e-04	0.02233850	0.00	0.00000000
Hras	3.852899	1.510840e-03	0.50883842	0.00	0.00000000
Zfp3	3.841315	5.114455e-04	0.08873494	0.04	0.07601050
Ddx39b	3.832277	4.891232e-04	0.07710155	0.00	0.00000000
Usp22	3.737919	5.298641e-04	0.11581800	0.00	0.00000000
Klhl12	3.736514	4.856357e-04	0.08977816	0.03	0.05474027
Sos1	3.734202	4.490229e-04	0.06746157	0.08	0.08100456
Srpr	3.715172	5.129288e-04	0.10960650	0.06	0.05903919
Paf1	3.708540	4.393314e-04	0.06518827	0.01	0.02870526
Cr1l	3.705035	5.489852e-04	0.13239437	0.02	0.02870526
Mllt1	3.704799	7.284579e-04	0.22851351	0.02	0.04725836
Atg4b	3.692641	4.343834e-04	0.06441625	0.03	0.08004164
Adgrb2	3.677084	7.523094e-04	0.24592423	0.00	0.00000000
Ptpn9	3.656028	4.299719e-04	0.06716645	0.00	0.00000000
Ccl25	3.644289	1.108397e-03	0.41355531	0.00	0.00000000
Shoc2	3.626294	4.418228e-04	0.07964369	0.04	0.04477567
Fbxl21	3.613199	1.101447e-03	0.41852254	0.02	0.04469135
Mapkap1	3.611761	4.571853e-04	0.09200734	0.01	0.05819251
Rab1a	3.606011	3.737265e-04	0.03610499	0.00	0.00000000
Deptor	3.605950	9.906267e-04	0.37284134	0.06	0.07134142
Prkcg	3.602075	7.944100e-04	0.28247348	0.06	0.07141530
Cmas	3.593084	5.762209e-04	0.16807787	0.05	0.09992460
Gars	3.570693	4.347369e-04	0.08392995	0.04	0.06456449
Nab2	3.560098	8.607381e-04	0.32408799	0.00	0.00000000
Camk2b	3.555844	1.217706e-03	0.48136010	0.00	0.00000000
Zfyve28	3.543840	1.541484e-03	0.60788705	0.00	0.00000000
Cinp	3.535892	5.946606e-04	0.18966077	0.04	0.07882238
Sv2c	3.523368	4.846297e-04	0.12480870	0.00	0.04601892
Exoc7	3.516054	4.042060e-04	0.07180231	0.03	0.07265210
Gatb	3.497547	4.969812e-04	0.13739178	0.04	0.08130374
Tbc1d19	3.486113	4.268478e-04	0.09264556	0.04	0.02969510
Rpl31	3.430600	6.422157e-04	0.23870380	0.00	0.00000000
Shc2	3.373070	8.141616e-04	0.34592122	0.08	0.07431971
Pwwp2a	3.366617	5.426359e-04	0.19192742	0.04	0.04242982
Tmem201	3.362425	4.858212e-04	0.15551960	0.03	0.09404391
Ets2	3.355769	4.310277e-04	0.11867200	0.00	0.00000000
Usp11	3.307890	3.821856e-04	0.09099815	0.00	0.00000000
Pip5k1a	3.306919	5.630132e-04	0.21752287	0.00	0.02870526
Inpp5f	3.303221	4.046954e-04	0.10901290	0.07	0.08917950
Dlg3	3.262813	2.950198e-04	0.02642120	0.03	0.04790514
Smim14	3.246076	4.138791e-04	0.12672658	0.00	0.00000000
Neurl1a	3.200176	4.917441e-04	0.19294012	0.01	0.05711887
Fbxl16	3.107004	1.610806e-03	0.79175400	0.00	0.00000000
Gapvd1	3.069548	3.413879e-04	0.10193510	0.09	0.07431971
Sod2	3.058528	4.252619e-04	0.17424199	0.00	0.00000000
Stx12	3.046696	3.540264e-04	0.11757355	0.07	0.09214901
Tmtc4	3.043816	7.063598e-04	0.37316153	0.06	0.09733540
Sdf4	3.009451	3.114821e-04	0.08644768	0.00	0.04491529
Map2k4	2.999305	3.173587e-04	0.09395645	0.02	0.08110606
Champ1	2.974812	2.877011e-04	0.07017911	0.00	0.00000000
Acp2	2.949098	3.297302e-04	0.11572978	0.00	0.03333514
Pafah1b2	2.898842	2.624456e-04	0.05884977	0.02	0.05819251
Hebp1	2.870185	7.701256e-04	0.46687625	0.00	0.00000000
Rnf170	2.861070	3.127506e-04	0.11811687	0.00	0.00000000
Ash2l	2.813025	3.130697e-04	0.12899461	0.08	0.08917950
Ppp6c	2.801741	2.560406e-04	0.07111877	0.00	0.06815234
Vps9d1	2.752026	3.558852e-04	0.18549208	0.04	0.08954965
Slc39a14	2.729249	2.454485e-04	0.07403332	0.05	0.05383287
Gap43	2.704938	4.326650e-04	0.26898637	0.00	0.00000000
Mrps33	2.694234	2.562921e-04	0.09419949	0.00	0.00000000
Xpo1	2.665370	2.717637e-04	0.11849779	0.03	0.09033540
Ccdc91	2.640045	2.549443e-04	0.10479948	0.02	0.02870526
Mark2	2.634688	4.299278e-04	0.28698891	0.00	0.00000000
Snph	2.618878	2.940597e-04	0.15479080	0.00	0.00000000
Mcu	2.580644	3.424844e-04	0.21712071	0.00	0.00000000
Wdr41	2.500277	2.485814e-04	0.13058880	0.01	0.02749916
Tmem231	2.492882	3.033496e-04	0.19866663	0.01	0.05371364
Scaf11	2.491321	1.859796e-04	0.04739775	0.03	0.05371364
Tacc2	2.481992	1.957458e-04	0.06369721	0.00	0.02762464
Cep350	2.435400	1.865062e-04	0.06075912	0.03	0.07386150
Zcchc18	2.393846	2.451321e-04	0.15403927	0.09	0.09303964
Ccm2	2.302499	6.063676e-04	0.56946982	0.00	0.00000000
Dusp1	2.283181	6.292297e-04	0.59866262	0.00	0.00000000
Itpka	2.189263	6.127467e-04	0.63068744	0.00	0.03142222
Megf9	2.175612	1.744405e-04	0.10707480	0.00	0.04386286
Nif3l1	2.158247	2.629922e-04	0.25139856	0.07	0.09733540
Hdac6	1.973692	1.398792e-04	0.09923511	0.03	0.05474027
Ctnnbl1	1.967265	1.322384e-04	0.08454230	0.05	0.08130374
Ufsp2	1.884930	1.186615e-04	0.07790923	0.07	0.09111025
Cs	1.651150	8.972635e-05	0.07368494	0.00	0.00000000
Phf24	1.633643	1.468710e-04	0.24184115	0.00	0.00000000
Nap1l2	1.140273	6.626075e-05	0.21387005	0.02	0.02895333
Appbp2	1.120806	5.014987e-05	0.13183590	0.01	0.04172459

## Sheet: ChAT_interneurons
Curve matching data				Assignment of whole striatum gene deregulation to ChAT interneurons
Gene name	Weighted deformation distance	Deformation distance	Maximum LFC across CAG repeats	P value	FDR
Vbp1	7.997889	0.0034369881	0.23301632	0.04	0.07084470
Eif1ax	7.983914	0.0022857118	0.09881806	0.00	0.00000000
Egr4	7.979117	0.0072552752	0.56751038	0.00	0.00000000
Dpp8	7.976797	0.0027503731	0.15745690	0.00	0.00000000
Ccnk	7.975989	0.0029607169	0.18220340	0.05	0.07989837
Ntng1	7.968767	0.0066765432	0.52537971	0.06	0.06079869
Lrp11	7.942346	0.0024767995	0.12660895	0.01	0.04491529
Ccny	7.934395	0.0021287187	0.08149411	0.04	0.06019868
Ubqln4	7.932864	0.0034416208	0.23952270	0.02	0.05903919
Rint1	7.923891	0.0029080254	0.18055085	0.03	0.05711887
Sbk1	7.905393	0.0036240681	0.26150838	0.01	0.02749916
Asrgl1	7.902164	0.0023229894	0.10992660	0.00	0.00000000
Cdk17	7.897824	0.0031399349	0.20950078	0.05	0.06378277
Smim14	7.885130	0.0018459252	0.04487665	0.02	0.02369528
Hirip3	7.814987	0.0024121826	0.12845880	0.01	0.06026740
Ptpn9	7.807874	0.0020394393	0.07839245	0.00	0.00000000
Sri	7.799395	0.0022968816	0.11448087	0.02	0.04832053
Napb	7.791355	0.0018589729	0.05338013	0.09	0.09404391
Map2k7	7.774197	0.0019794740	0.07229420	0.08	0.09870655
Filip1l	7.756921	0.0025534364	0.15143807	0.05	0.09858542
Dmap1	7.729990	0.0022100882	0.10817125	0.05	0.08524171
Fxr2	7.708095	0.0017998333	0.05038814	0.02	0.02895333
Fam160a2	7.673425	0.0019335184	0.07303996	0.00	0.04040000
Gstcd	7.665168	0.0025206997	0.15499630	0.06	0.08584593
Msh2	7.638879	0.0026464973	0.17345110	0.09	0.04958182
Crebrf	7.631028	0.0027446119	0.18652672	0.01	0.02796923
Ercc6	7.628227	0.0018625843	0.06576274	0.00	0.02762464
Zfp423	7.614883	0.0030217233	0.22187852	0.02	0.04601892
Slc25a46	7.595255	0.0022200060	0.12034708	0.00	0.00000000
Fnbp1	7.578550	0.0026369802	0.17759050	0.04	0.04914803
E2f6	7.541090	0.0021417297	0.11368880	0.00	0.00000000
Sec14l1	7.534534	0.0050004871	0.43853350	0.03	0.07265210
Tmod3	7.527727	0.0020062064	0.09500960	0.00	0.00000000
Eif2s2	7.502102	0.0018703178	0.07646738	0.02	0.06869199
Usp47	7.473013	0.0023353775	0.14667017	0.01	0.04688395
Rad21	7.461389	0.0021844849	0.12640446	0.09	0.09019095
Adh5	7.448035	0.0019564961	0.09387873	0.00	0.00000000
Tbc1d1	7.447492	0.0023534165	0.15138740	0.00	0.00000000
Sesn1	7.437759	0.0019996787	0.10122638	0.03	0.05580432
Depdc5	7.419190	0.0031183060	0.25266699	0.00	0.00000000
Tada3	7.415142	0.0024774196	0.17124380	0.04	0.07555753
Tkt	7.382369	0.0017257462	0.06272047	0.00	0.04469135
Flii	7.353478	0.0025533527	0.18716748	0.02	0.04683490
Ttyh3	7.352935	0.0030913099	0.25615447	0.00	0.00000000
Tspan12	7.290620	0.0016785950	0.06196399	0.01	0.02675844
Dhx57	7.290252	0.0018824077	0.09513335	0.01	0.02298149
Kctd8	7.270546	0.0028680681	0.23659320	0.00	0.02969510
Nup35	7.257429	0.0027224441	0.21894670	0.00	0.00000000
Meaf6	7.253348	0.0019046553	0.10168566	0.09	0.05945406
Tmcc1	7.249199	0.0017129569	0.07093045	0.00	0.00000000
Il20ra	7.198248	0.0040195206	0.38076550	0.00	0.00000000
Syt16	7.171859	0.0028927972	0.24994130	0.00	0.00000000
Vim	7.169375	0.0022159820	0.15660140	0.00	0.00000000
Rem2	7.154099	0.0054256640	0.52960706	0.00	0.00000000
Tarsl2	7.150541	0.0021202056	0.14394690	0.01	0.04505706
Atg16l1	7.135416	0.0025151463	0.20284948	0.00	0.00000000
Arhgap26	7.131570	0.0019363555	0.11703159	0.06	0.08080000
Gadd45b	7.129289	0.0020198929	0.13040250	0.03	0.04725836
Rhbdf1	7.074910	0.0018519181	0.10826101	0.03	0.06026740
Nsmaf	7.049721	0.0017484215	0.09313171	0.05	0.07555753
Ddit4l	7.042978	0.0252675775	1.75696832	0.00	0.00000000
Gm5148	7.029538	0.0035604402	0.34883848	0.00	0.00000000
Camsap3	7.019498	0.0028796979	0.26448223	0.00	0.00000000
Prmt8	7.017083	0.0031190055	0.29588707	0.01	0.04469135
Paf1	6.996531	0.0015636943	0.06518827	0.02	0.04725836
Tnfaip8l1	6.992814	0.0023814665	0.19786313	0.06	0.07632324
Xpo7	6.964296	0.0017763906	0.10519040	0.03	0.05147490
Hpca	6.927500	0.0067448230	0.68551970	0.00	0.00000000
Rhobtb2	6.925888	0.0063483870	0.65041954	0.00	0.00000000
Pak4	6.920006	0.0015897225	0.07617470	0.01	0.04469135
Esam	6.825441	0.0019297561	0.14360660	0.12	0.08447571
Ubp1	6.771184	0.0019781170	0.15684270	0.03	0.08147054
Rerg	6.767414	0.0045387890	0.49551366	0.00	0.00000000
Bora	6.732755	0.0017309093	0.11793720	0.00	0.00000000
Glrx2	6.714227	0.0019859803	0.16373000	0.03	0.07761523
Slc6a8	6.710018	0.0017461189	0.12274925	0.00	0.00000000
Ppp2r2c	6.698157	0.0022453496	0.20743516	0.00	0.00000000
Srf	6.670715	0.0036770779	0.40903174	0.00	0.00000000
Akt3	6.665797	0.0015262474	0.08608468	0.09	0.08763543
Ak3	6.619509	0.0015497912	0.09471760	0.02	0.08447571
Snx10	6.584456	0.0017644501	0.13794730	0.00	0.00000000
Pabpc4	6.578806	0.0016995619	0.12664480	0.02	0.06631003
Dazap1	6.518951	0.0013734148	0.06849038	0.00	0.02870526
Rasgef1a	6.506096	0.0040528872	0.47850220	0.00	0.00000000
Glra2	6.504965	0.0036990772	0.43497879	0.00	0.00000000
Syn2	6.481553	0.0011168301	0.01560188	0.04	0.05474027
Asns	6.430675	0.0014251995	0.08705832	0.00	0.02445740
Dapk1	6.391587	0.0014384443	0.09338668	0.00	0.00000000
Lrrc24	6.305806	0.0014811709	0.11032620	0.04	0.03142222
Spns1	6.272301	0.0015606670	0.12983710	0.02	0.06248765
Nipsnap1	6.263211	0.0016016705	0.13898340	0.00	0.00000000
Osbp2	6.214339	0.0022988984	0.27155150	0.00	0.02836080
Atf2	6.202335	0.0017333327	0.17125220	0.07	0.08399902
Nsun5	6.182776	0.0015358647	0.13385948	0.02	0.06260920
Echs1	6.170748	0.0012621279	0.07572335	0.02	0.05597184
Dgkq	6.151905	0.0015275282	0.13530895	0.00	0.00000000
Trip4	6.111459	0.0014930900	0.13226346	0.04	0.08285311
Trpc3	6.092409	0.0011701590	0.06147881	0.07	0.08130374
Acat1	6.070510	0.0012680890	0.08661030	0.03	0.08160000
Sh3bgrl	6.045043	0.0023987587	0.31020309	0.05	0.06930792
Sec22a	6.027682	0.0013168762	0.10203560	0.00	0.02862992
Camk1g	5.953435	0.0023261651	0.31012610	0.09	0.07953750
Mospd1	5.943854	0.0015928137	0.17145100	0.02	0.06311693
Alyref2	5.934974	0.0023794877	0.32190743	0.00	0.00000000
Agk	5.934491	0.0017680745	0.20854400	0.10	0.09443802
Hk1	5.883525	0.0014345207	0.14374783	0.04	0.09283404
Nucb2	5.863547	0.0018298466	0.22953640	0.00	0.00000000
Gpkow	5.848181	0.0012974138	0.11591164	0.04	0.07133486
Rab9b	5.793823	0.0013238428	0.12799040	0.01	0.06954291
Arhgef15	5.770291	0.0013124564	0.12783380	0.03	0.05819251
Ski	5.745880	0.0017320764	0.22431410	0.06	0.09777928
Atmin	5.737526	0.0010703449	0.07021313	0.00	0.00000000
Itgam	5.686425	0.0011118365	0.08638266	0.09	0.08130374
Dzip1l	5.684134	0.0018327307	0.25315615	0.00	0.00000000
Mbtps2	5.674384	0.0013543594	0.14855710	0.02	0.04725836
Slco1c1	5.611083	0.0018202535	0.26035996	0.00	0.04040000
Inpp5b	5.557722	0.0010806608	0.09149065	0.04	0.06740080
Kcnh3	5.509710	0.0032422889	0.53346811	0.00	0.00000000
Zhx1	5.465095	0.0013819504	0.18021859	0.03	0.04505706
Dcaf5	5.451302	0.0009133987	0.05440855	0.01	0.04294951
Dhrs3	5.382807	0.0016603925	0.25700120	0.05	0.08080000
Rce1	5.375998	0.0013770441	0.19026332	0.05	0.04705995
Adi1	5.350940	0.0010733895	0.11227791	0.02	0.05924732
Nip7	5.282515	0.0011827382	0.15103384	0.04	0.04040000
Ldlrad4	5.271385	0.0019179313	0.33079095	0.04	0.08447571
Rbbp5	5.246061	0.0008484378	0.05523475	0.02	0.04532125
Caln1	5.138584	0.0020664445	0.38464370	0.02	0.02796923
Ctnnb1	5.135063	0.0009104241	0.08759223	0.01	0.02870526
Tmem62	5.108632	0.0008822377	0.08141766	0.04	0.06631003
Uba2	5.104691	0.0008796249	0.08100423	0.04	0.07278771
Zdhhc2	5.079602	0.0013303618	0.21805090	0.03	0.06360126
Alg9	4.931517	0.0013344536	0.24074928	0.05	0.09228567
Snx4	4.914509	0.0011129943	0.17883831	0.02	0.04477567
Tor1aip2	4.838508	0.0007944694	0.08254184	0.11	0.09194163
Axl	4.809950	0.0008763883	0.11547125	0.06	0.09992460
Klhl2	4.580101	0.0012558656	0.27374269	0.00	0.00000000
Rab40b	4.410275	0.0010390224	0.23088120	0.00	0.02510379
Cdk5r1	4.385021	0.0008168933	0.15179491	0.03	0.04570678
Zfp90	4.217993	0.0007528161	0.15048700	0.00	0.00000000
Dctn4	4.213619	0.0006798249	0.11878994	0.03	0.07904348
Tmem231	4.188918	0.0008493617	0.19573610	0.01	0.04417570
Pou3f3	4.123465	0.0007780406	0.17645480	0.00	0.00000000
Lancl1	4.054828	0.0005201683	0.06247020	0.03	0.05474027
Glul	3.902270	0.0008544643	0.24908251	0.00	0.04417570
Hcn3	3.881933	0.0009179235	0.28046830	0.00	0.04211354
Ube4b	3.742072	0.0006126389	0.16143950	0.07	0.08646053
Ift80	3.633423	0.0006438279	0.19834322	0.05	0.07821071
Arhgap10	3.609234	0.0011717664	0.44843041	0.00	0.00000000
Zfp248	3.531529	0.0005276718	0.15045775	0.00	0.00000000
Tsg101	3.410795	0.0003919778	0.08046375	0.04	0.06631003
Pptc7	3.123570	0.0006019751	0.28548515	0.00	0.00000000
Fam117b	3.095868	0.0002918182	0.05178991	0.02	0.02969510
Gars	2.862251	0.0002793424	0.08392995	0.03	0.05498341
Scfd1	2.015393	0.0001708447	0.14854620	0.04	0.04601892
Shmt2	1.659039	0.0001528844	0.24528932	0.00	0.00000000
Ppp6c	1.446742	0.0000663629	0.06308205	0.00	0.06877951

## Sheet: astrocytes
Curve matching data				Assignment of whole-striatum gene deregulation to astrocytes
Gene name	Weighted deformation-distance	Deformation distance	Maximum LFC across CAG repeats	P value	FDR
Lancl1	5.100258	8.229686e-04	0.06247020	0.03	0.05408550
Ercc5	5.606623	9.981570e-04	0.06350541	0.09	0.09708550
Rev1	2.089805	1.700804e-04	0.12405295	0.05	0.08954965
Xrcc5	7.462835	1.951288e-03	0.09191160	0.04	0.06248765
Cfh	7.644531	1.662330e-03	0.03334438	0.00	0.00000000
Glul	6.948094	2.283919e-03	0.18781980	0.00	0.05147490
Farp2	3.985924	8.143658e-04	0.21594670	0.03	0.06053363
Igsf8	7.654282	2.517631e-03	0.15552850	0.01	0.04386286
Vcpip1	6.483927	1.578408e-03	0.11273340	0.02	0.02870526
Sned1	4.875886	1.072912e-03	0.17178220	0.03	0.07964571
Rnf149	7.703291	1.991667e-03	0.07933805	0.00	0.00000000
Usp21	2.853820	3.768288e-04	0.18021390	0.00	0.00000000
Chil1	6.002801	2.088647e-03	0.26133989	0.02	0.06604163
Clasp1	5.140111	1.038366e-03	0.12690640	0.02	0.05787405
Oprm1	7.942318	4.009480e-03	0.29725406	0.00	0.00000000
Tab2	7.037155	1.440480e-03	0.03933238	0.01	0.02870526
Nr2e1	6.499243	2.056736e-03	0.19779284	0.01	0.02870526
Plagl1	7.050304	2.334473e-03	0.18530930	0.07	0.08815421
Grm1	7.807395	2.870487e-03	0.18623310	0.07	0.08793508
Vta1	5.445009	1.030567e-03	0.08957573	0.02	0.02870526
Fabp7	4.623087	2.267911e-03	0.53010385	0.00	0.00000000
Ahi1	5.643850	2.133232e-03	0.31835856	0.01	0.04790514
Ccar1	7.906537	2.332607e-03	0.11084990	0.01	0.03142222
Osbpl8	7.847261	3.770003e-03	0.28244310	0.02	0.04505706
Enah	2.918679	5.196690e-04	0.28104680	0.00	0.00000000
Polr3b	2.203540	1.916593e-04	0.12826678	0.00	0.05529197
Kif1bp	6.355103	1.457455e-03	0.10072399	0.00	0.00000000
Hk1	6.186653	1.586145e-03	0.14374783	0.05	0.08160000
Sesn1	4.572956	5.858370e-04	0.02928722	0.00	0.00000000
Aida	5.720665	1.313883e-03	0.13362430	0.14	0.09858542
Ckap4	5.440575	1.923843e-03	0.30619489	0.00	0.00000000
Gpr6	7.458416	7.966930e-03	0.69673760	0.00	0.00000000
Tet1	6.264494	2.085131e-03	0.22892139	0.00	0.00000000
Foxo3	6.729590	1.342972e-03	0.04455898	0.06	0.08712460
Ppfia2	5.996970	2.105005e-03	0.26505852	0.00	0.00000000
Cpsf6	4.764435	6.580253e-04	0.03840599	0.04	0.07656452
Rpa1	4.247001	6.861763e-04	0.11678741	0.06	0.09033540
Poldip2	5.243363	9.285866e-04	0.08116743	0.00	0.00000000
Flii	6.444246	1.960963e-03	0.18716748	0.02	0.05787405
Polr2a	6.430602	3.648101e-03	0.43925130	0.01	0.02895333
Cs	5.449151	9.772476e-04	0.07368494	0.01	0.02796923
Cct4	6.442713	1.296971e-03	0.05898022	0.04	0.09930694
Ap1b1	7.646345	1.950171e-03	0.07754056	0.03	0.07007057
Aldoc	3.106230	3.948148e-04	0.13968037	0.01	0.06707540
Wsb1	7.294956	3.830941e-03	0.34845736	0.02	0.06053363
Rab1a	5.445601	9.834296e-04	0.07587187	0.00	0.00000000
Jade2	6.433157	1.593946e-03	0.12060120	0.00	0.04930169
Vdac1	5.804346	1.116395e-03	0.07564616	0.00	0.02762464
Eif4enif1	7.003294	1.876274e-03	0.11850873	0.09	0.09456861
Nxn	6.815393	2.170570e-03	0.18359040	0.01	0.05556823
Ywhae	5.517720	1.026986e-03	0.08079455	0.06	0.06908756
Atp5b	7.345931	1.938171e-03	0.09930678	0.02	0.07028440
Dctn2	7.170979	1.869790e-03	0.10300087	0.03	0.07278771
Ccdc88a	6.313081	1.774128e-03	0.16719245	0.04	0.07265210
Rapgef6	6.281716	1.190186e-03	0.04919827	0.01	0.04705995
Baz2a	2.732439	2.673841e-04	0.09843543	0.06	0.07601050
H2afv	2.603522	2.350491e-04	0.08886820	0.01	0.05426866
Spred2	7.862075	2.600254e-03	0.14859070	0.02	0.04688395
5730455P16Rik	4.893943	8.222172e-04	0.08591469	0.09	0.08354178
Evi2a	6.362210	1.909996e-03	0.18692325	0.00	0.00000000
Eif5a	5.557536	1.360003e-03	0.16357130	0.04	0.06026740
Mien1	7.707941	2.323016e-03	0.12529900	0.00	0.02749916
Rundc3a	6.634912	1.814806e-03	0.14206646	0.00	0.00000000
Brms1l	5.217622	8.213896e-04	0.04929034	0.06	0.08447571
Ggnbp2	6.809927	1.685379e-03	0.10284590	0.02	0.06740080
Gna13	6.425063	1.486475e-03	0.10006942	0.00	0.00000000
Map2k6	6.055289	1.574225e-03	0.15523720	0.02	0.05627143
Itsn2	6.022324	1.337734e-03	0.10732461	0.01	0.04639556
Rasl10b	7.339807	3.065423e-03	0.25432860	0.03	0.07392420
Spag9	4.532209	6.993369e-04	0.08348981	0.05	0.07620163
Cacnb1	7.264564	3.298350e-03	0.29056720	0.00	0.00000000
Kat2a	6.384351	1.229121e-03	0.04913688	0.00	0.02836080
Scfd1	7.755864	2.063449e-03	0.08568848	0.00	0.04363200
Sec23a	6.558207	1.461604e-03	0.08294783	0.01	0.06323478
Ralgapa1	7.534909	2.512434e-03	0.16522617	0.00	0.00000000
Fn3k	7.718354	2.910128e-03	0.19892626	0.03	0.09145767
Srsf2	4.284303	8.624737e-04	0.18547680	0.06	0.07555753
Ldah	4.136832	6.786831e-04	0.12974625	0.07	0.09404391
Cbx4	6.189406	4.699704e-03	0.60760847	0.00	0.00000000
E2f6	6.171679	1.396529e-03	0.10551050	0.00	0.00000000
Gmpr	7.767231	3.079813e-03	0.21448970	0.09	0.08917405
Gtf2a1	5.802992	1.243773e-03	0.10774100	0.01	0.04761429
Ptpn21	7.110214	1.795954e-03	0.09602554	0.03	0.06106260
Papola	7.474296	2.086582e-03	0.11114946	0.10	0.09228567
Psmc1	5.133565	8.919365e-04	0.08176546	0.05	0.06152017
Wars	7.408628	1.982595e-03	0.10100650	0.02	0.04477567
Cinp	5.441272	1.408224e-03	0.18966077	0.01	0.06203974
Zkscan3	3.948576	8.539100e-04	0.24005770	0.09	0.09404391
Exoc2	5.332536	1.067403e-03	0.11267532	0.04	0.04505706
Ddx46	7.358903	1.845542e-03	0.08377960	0.12	0.09596877
Asb13	6.831250	1.792294e-03	0.11973278	0.04	0.08562194
Daam1	2.830580	2.835186e-04	0.09486072	0.11	0.09656439
Dbn1	7.762487	2.830956e-03	0.18543399	0.00	0.00000000
Phf2	6.400048	1.345867e-03	0.07321535	0.02	0.07972313
Uqcrfs1	7.295049	1.876390e-03	0.09379057	0.03	0.04211354
Ubr7	6.118189	1.287387e-03	0.08645083	0.04	0.09068942
Dcaf5	7.426388	2.003687e-03	0.10275017	0.01	0.07265210
Zfp65	6.522088	1.710815e-03	0.13418350	0.00	0.00000000
Trappc13	4.727435	7.143830e-04	0.06537938	0.00	0.03445279
Ndufs4	7.616229	2.442984e-03	0.14896355	0.02	0.07265178
Bap1	6.717298	1.968860e-03	0.16056080	0.11	0.09976029
Wbp4	7.896754	2.149038e-03	0.08704783	0.03	0.06223079
Cct5	7.066725	1.632053e-03	0.07167472	0.05	0.07134142
Slitrk5	7.531097	2.049270e-03	0.10109259	0.03	0.04469135
AW549877	4.900147	7.984023e-04	0.07663599	0.00	0.04491529
Ercc6	7.751744	2.682778e-03	0.16817910	0.02	0.05809241
Msra	5.504193	1.473302e-03	0.19735238	0.04	0.06311693
Vwa8	7.279835	1.810218e-03	0.08444534	0.00	0.00000000
Cdk7	6.817086	1.414199e-03	0.05164088	0.06	0.09777928
Dazap2	4.039154	7.471213e-04	0.17671392	0.01	0.02749916
Cacnb3	7.590490	3.360836e-03	0.26375460	0.02	0.05819251
Adcy9	7.840060	2.950478e-03	0.19283020	0.00	0.00000000
Atxn10	6.634473	1.240069e-03	0.03078233	0.02	0.06932451
Rrm2b	6.829762	1.902560e-03	0.13865100	0.02	0.04409008
Rad21	5.864287	1.349398e-03	0.12640446	0.07	0.07972313
Ebag9	7.938138	2.927394e-03	0.18158800	0.03	0.04532125
Adsl	5.811580	1.198038e-03	0.09558125	0.00	0.00000000
Twf1	7.697976	1.792551e-03	0.04999557	0.00	0.00000000
Hdac7	7.249394	1.776266e-03	0.08136955	0.03	0.08445477
Adck5	7.706930	2.319471e-03	0.12490359	0.01	0.05711887
Dnm1l	7.282632	1.749360e-03	0.07431644	0.00	0.00000000
Snx4	4.101653	6.577594e-04	0.12528010	0.02	0.02870526
Asic1	6.243044	2.101429e-03	0.23427870	0.08	0.06740080
Map3k12	7.614547	2.368252e-03	0.13910160	0.03	0.07141530
Abcc1	6.886691	1.751217e-03	0.10765820	0.01	0.03666555
Scaf11	5.607224	9.421106e-04	0.04739775	0.00	0.00000000
Atg101	5.153352	1.091641e-03	0.14113590	0.03	0.08646053
Abcd2	3.510085	4.287042e-04	0.08987665	0.04	0.08130374
Cbx6	7.268641	2.175316e-03	0.14166450	0.02	0.02749916
Sod2	7.259791	2.009336e-03	0.11745060	0.00	0.00000000
Stk38	6.044789	1.154444e-03	0.06208926	0.04	0.06456449
Trim26	4.325255	8.070236e-04	0.15679738	0.01	0.02969510
Pigq	6.191502	1.266979e-03	0.07489529	0.06	0.09858542
Rhot2	5.406127	1.456750e-03	0.20600261	0.03	0.06139216
Pbx2	5.333869	1.182431e-03	0.14468203	0.05	0.07675277
Rgmb	7.993240	3.026583e-03	0.18826146	0.00	0.02862992
Zfp52	6.612371	1.995668e-03	0.17559580	0.03	0.06495524
Xpo5	6.352568	1.269796e-03	0.06094155	0.04	0.06908756
Zfp760	6.204274	1.465484e-03	0.11702040	0.00	0.00000000
Dus3l	5.125010	8.811344e-04	0.07919710	0.01	0.04470045
Lpin2	7.353339	2.451016e-03	0.17326880	0.03	0.06860377
Lrpprc	7.550668	2.236080e-03	0.12626522	0.05	0.08622347
Msh2	6.733056	1.486759e-03	0.07267475	0.06	0.06026740
Mllt1	5.690926	1.718862e-03	0.22851351	0.00	0.00000000
Nudt12	7.241313	3.767200e-03	0.34760210	0.00	0.00000000
Sos1	2.936191	3.241196e-04	0.11315221	0.03	0.07904348
Slc25a46	7.977546	2.449109e-03	0.12034708	0.03	0.05881765
Elp2	7.407946	2.147768e-03	0.12559879	0.07	0.09721064
Dnajc18	7.370954	1.946961e-03	0.09862509	0.02	0.06474037
Ik	5.432644	1.074827e-03	0.10347327	0.01	0.02742672
Ppp2r2b	7.413129	1.994890e-03	0.10250124	0.04	0.08470227
Hsd17b4	6.773266	1.796443e-03	0.12576105	0.00	0.00000000
Asrgl1	2.888866	2.978008e-04	0.09735920	0.11	0.09676234
Incenp	7.958550	3.025448e-03	0.19113190	0.00	0.00000000
Prpf19	6.469901	1.359543e-03	0.06990027	0.00	0.04469135
Ehbp1l1	7.635229	2.361603e-03	0.13647505	0.01	0.04470045
Rnf165	7.981727	2.519717e-03	0.12889630	0.00	0.02369528
Dhx57	6.929902	1.813808e-03	0.11456611	0.01	0.02796923
Vps13a	7.225570	2.192784e-03	0.14807585	0.07	0.09497015
Pcdhb16	5.204608	2.479144e-03	0.45667164	0.03	0.08130374
Kdm2a	6.984443	1.732152e-03	0.09588335	0.03	0.08100456
Ppp4r1	6.339114	1.322559e-03	0.07369227	0.03	0.04725836
Lrrtm2	4.941437	8.473248e-04	0.08907647	0.05	0.09443802
Pcdhb22	6.906878	3.483915e-03	0.35457860	0.00	0.00000000
Ndor1	5.588951	1.377594e-03	0.16409510	0.03	0.07005780
Nolc1	6.899601	1.995582e-03	0.14745685	0.00	0.00000000
Tjp2	6.589672	1.769450e-03	0.13834489	0.01	0.02870526
Arl3	7.445650	2.670312e-03	0.19403030	0.00	0.04242982
Stam	7.612173	1.915419e-03	0.07494085	0.00	0.04086744
Ppp6c	5.360495	9.372655e-04	0.07111877	0.06	0.07816599
Rab14	7.936387	1.861571e-03	0.04364700	0.00	0.04469135
Gca	7.291740	2.010095e-03	0.11486130	0.01	0.05819251
Ndufa8	6.241588	1.954431e-03	0.20829639	0.00	0.04470045
Gpsm1	6.351450	1.798689e-03	0.16773650	0.01	0.05474027
Baz2b	5.697721	1.758510e-03	0.23598896	0.00	0.04725836
Cacul1	5.386807	9.350156e-04	0.06764655	0.00	0.00000000
Tanc1	7.768168	3.123039e-03	0.21939950	0.06	0.07555753
Rabgap1	6.383318	1.528761e-03	0.11252424	0.02	0.04725836
Fbxw2	1.524222	7.162459e-05	0.05524279	0.07	0.08422708
Agps	4.869790	7.193670e-04	0.05076332	0.04	0.07112405
Skida1	6.006852	1.139095e-03	0.06186627	0.05	0.06792527
Fign	3.534075	1.107738e-03	0.44176557	0.00	0.00000000
Dstn	7.903800	2.661201e-03	0.15268381	0.00	0.03333514
Tomm34	6.980573	1.671402e-03	0.08566522	0.00	0.00000000
Spred1	7.619250	2.552137e-03	0.16304010	0.00	0.04930169
Sec23b	5.087921	1.133824e-03	0.16180880	0.13	0.09636615
Nkx2-2	6.590621	2.869425e-03	0.31277648	0.00	0.02870526
Snph	6.703257	2.201824e-03	0.20001180	0.00	0.03445279
Stx16	7.017264	1.568982e-03	0.06447031	0.04	0.05972564
Oprl1	7.813171	4.664297e-03	0.37410938	0.00	0.00000000
Shc4	7.948845	2.705366e-03	0.15434830	0.00	0.00000000
Pank2	1.124275	5.142105e-05	0.13781960	0.04	0.08000445
Ube2v1	7.354012	1.886719e-03	0.09064873	0.01	0.05889584
Snapin	7.885533	2.277855e-03	0.10524614	0.00	0.00000000
Pkn2	5.380970	9.972653e-04	0.08687390	0.07	0.05819251
Hdgf	7.511051	1.825614e-03	0.06885786	0.00	0.03897889
Vps45	7.772086	2.166426e-03	0.09887238	0.03	0.06427657
Zfhx4	6.068879	2.590218e-03	0.33860935	0.07	0.08697312
Mfn1	7.645754	2.605314e-03	0.16758982	0.00	0.06495524
Dhx36	7.461754	2.065903e-03	0.10913577	0.00	0.00000000
Kpna4	6.374550	1.342477e-03	0.07478297	0.06	0.09721064
Pfn2	7.844635	2.007758e-03	0.07119301	0.02	0.05556823
Hs2st1	6.689992	1.594722e-03	0.09692102	0.07	0.09393000
Cxxc4	7.293791	3.869064e-03	0.35280480	0.03	0.07972313
Isg20l2	4.120272	5.942935e-04	0.09166331	0.03	0.05260794
Phtf1	6.716747	1.448612e-03	0.06665273	0.00	0.00000000
Dmap1	7.524749	1.998521e-03	0.09410386	0.02	0.05498341
Hsdl2	2.166793	2.335959e-04	0.20536700	0.08	0.07632324
Bag1	7.549506	2.180996e-03	0.11859858	0.07	0.06997718
Dctn3	7.886896	2.626368e-03	0.14978804	0.02	0.02862992
Vcp	5.488023	1.055022e-03	0.09185430	0.00	0.00000000
Ybx1	6.368188	1.267212e-03	0.05899597	0.00	0.04491529
Epha8	6.813884	2.871160e-03	0.28638280	0.03	0.07651295
Hmgcl	5.568009	1.219327e-03	0.12713373	0.02	0.06456449
Nsun4	7.678595	1.878109e-03	0.06438903	0.00	0.00000000
Phc2	7.524552	2.186671e-03	0.12145690	0.00	0.02762464
Stx12	7.943725	2.406721e-03	0.11757355	0.08	0.09437779
Zmym6	3.948957	6.169746e-04	0.12900093	0.00	0.00000000
Frmd3	4.309614	6.644532e-04	0.09812760	0.05	0.05785505
Wdr1	6.370165	1.584129e-03	0.12480520	0.07	0.08976375
Agap3	5.318940	1.137255e-03	0.13402130	0.02	0.03002801
Pgd	3.983858	6.040273e-04	0.11691376	0.07	0.09131889
Klf3	7.781968	2.275228e-03	0.11294720	0.02	0.05627143
Nsun7	6.982173	3.752563e-03	0.37735110	0.00	0.00000000
Crlf2	5.394451	1.227351e-03	0.14943710	0.02	0.02796923
Cep104	6.068525	1.870484e-03	0.21267870	0.07	0.08644627
Mapk10	7.500390	1.933786e-03	0.08630071	0.00	0.00000000
Mrfap1	6.181865	1.203697e-03	0.06122767	0.01	0.02749916
Srpk2	7.601898	2.010216e-03	0.08979263	0.02	0.04725836
Kif1b	7.752338	2.578403e-03	0.15500213	0.02	0.04914803
Aurkaip1	6.993105	2.021379e-03	0.14291546	0.00	0.00000000
Sema4f	6.964051	1.917535e-03	0.12879593	0.08	0.08021499
Hip1r	7.462365	2.326426e-03	0.14635060	0.10	0.07373000
Nsun5	6.724134	1.816597e-03	0.13385948	0.02	0.06260920
Dynll1	7.408379	2.823188e-03	0.21721066	0.05	0.05720979
Sbds	7.604163	1.973589e-03	0.08422072	0.00	0.00000000
Diablo	7.735276	2.219123e-03	0.10899669	0.04	0.07904348
Rnf34	6.575093	1.210877e-03	0.02923438	0.08	0.09404391
Ints1	4.431056	6.482919e-04	0.07461646	0.03	0.08110606
Ube3b	5.750463	1.046550e-03	0.06257087	0.02	0.07675277
Pot1a	5.244394	9.578566e-04	0.09013987	0.00	0.02298149
Gars	4.977030	7.913792e-04	0.06522586	0.03	0.04491529
Herc3	7.589276	2.907598e-03	0.21050449	0.00	0.00000000
Nfe2l3	6.625136	4.248721e-03	0.48386239	0.00	0.00000000
Tet3	7.546778	2.538517e-03	0.16761866	0.08	0.08354178
Lmtk2	6.297089	2.014895e-03	0.21283069	0.05	0.07386150
Tmem130	5.293388	2.019301e-03	0.34892005	0.00	0.00000000
Ptpn11	6.708291	1.413902e-03	0.06052862	0.05	0.08100456
Gpr85	4.580807	1.275672e-03	0.27969994	0.00	0.00000000
Dnajc30	6.982814	1.849778e-03	0.11592720	0.03	0.07292256
Dusp11	7.065064	2.070482e-03	0.14405005	0.00	0.00000000
Rab43	3.933510	4.651887e-04	0.04832034	0.10	0.08169778
Aldh1l1	4.039651	5.828321e-04	0.09762388	0.07	0.09829187
Ptms	7.601584	3.284181e-03	0.25389250	0.00	0.04519029
Slco1a4	7.962730	2.750751e-03	0.15866360	0.02	0.05383287
Ing4	7.487480	1.992828e-03	0.09621002	0.05	0.04477567
Strn4	6.745350	1.710459e-03	0.11312910	0.06	0.09858542
Arntl2	6.876292	1.512842e-03	0.06564311	0.01	0.04688395
C3ar1	7.498817	2.050712e-03	0.10389240	0.00	0.04470045
Actn4	5.858206	1.106549e-03	0.06783317	0.07	0.04930169
Rab7	6.197563	1.201786e-03	0.05936164	0.02	0.04446502
Tsg101	5.632701	1.069014e-03	0.08046375	0.03	0.07731352
Ate1	7.335915	1.994162e-03	0.10873170	0.09	0.09930694
Dctpp1	7.410735	2.726328e-03	0.20457590	0.03	0.05720979
Sbk1	5.686368	1.445277e-03	0.16856030	0.01	0.03142222
Tead1	4.458591	7.698748e-04	0.12231800	0.00	0.00000000
Rhog	6.200354	1.298757e-03	0.08122920	0.01	0.05260794
Bnip3	7.221297	1.617325e-03	0.05690793	0.00	0.00000000
Ankrd10	6.818973	1.945343e-03	0.14681350	0.02	0.05556823
Adam9	7.086967	1.971719e-03	0.12655922	0.02	0.04470045
Ash2l	7.850464	2.241918e-03	0.10313500	0.00	0.07651295
Nr3c2	7.820410	2.780669e-03	0.17428748	0.00	0.00000000
Ufsp2	7.050173	1.660041e-03	0.07790923	0.01	0.04172459
Smad1	2.145881	1.827287e-04	0.12993808	0.07	0.05819251
Phlpp2	7.416770	2.778954e-03	0.21076470	0.00	0.00000000
Cfap20	7.619020	2.405077e-03	0.14367313	0.00	0.00000000
Terf2	7.285463	1.752507e-03	0.07460942	0.01	0.04505706
Bag4	7.470439	2.283386e-03	0.13965170	0.02	0.06536629
Tfdp1	7.213785	1.684422e-03	0.06893448	0.06	0.09187443
Zfhx3	6.731912	1.857912e-03	0.14028620	0.03	0.05711887
Atmin	6.239219	1.265712e-03	0.07021313	0.05	0.04086744
Ctxn1	7.878577	3.205812e-03	0.21865630	0.00	0.00000000
Unc5d	5.005481	1.701898e-03	0.32417780	0.00	0.00000000
Dlat	5.975819	1.288583e-03	0.10070160	0.04	0.06997718
Cbfa2t3	3.362877	5.149834e-04	0.17481640	0.04	0.07821071
Rhoa	4.564993	6.924574e-04	0.07644309	0.06	0.08004164
Wdr82	6.946289	1.479043e-03	0.05365279	0.06	0.07857323
Jam3	7.870569	3.058600e-03	0.20267613	0.02	0.04386286
Usp2	6.331339	1.700865e-03	0.15138740	0.02	0.04705995
Acat1	6.725300	1.556405e-03	0.08661030	0.00	0.00000000
Fez1	6.167942	1.122122e-03	0.04309995	0.00	0.00000000
Gnb5	7.375063	2.427750e-03	0.16809190	0.09	0.08160000
Polr2m	4.162687	6.607959e-04	0.11753270	0.10	0.07904348
Irak1bp1	6.804633	1.536064e-03	0.07597024	0.00	0.00000000
Pknox2	5.930417	1.662599e-03	0.18755664	0.00	0.00000000
Rab8b	7.177831	1.608160e-03	0.05869072	0.03	0.07134142
Zfp653	7.519339	2.289714e-03	0.13637180	0.00	0.00000000
Ppp2r3a	6.030974	1.536268e-03	0.14989930	0.00	0.04332754
H2afx	7.367053	2.704117e-03	0.20586070	0.00	0.00000000
Slc35f3	7.501363	2.325554e-03	0.14286984	0.00	0.02895333
Drp2	6.965086	1.634844e-03	0.08051261	0.05	0.07497591
Dlg3	7.121246	1.671021e-03	0.07403058	0.03	0.03224974
Uba1	5.378459	1.251605e-03	0.15777258	0.05	0.07972313
Ndufa1	7.424311	2.586419e-03	0.18500425	0.00	0.00000000
Hsd17b10	4.749846	7.509780e-04	0.07694455	0.00	0.02870526
Pdha1	6.567562	1.237109e-03	0.03554979	0.03	0.05720979
Msl3	6.901900	1.814295e-03	0.11714230	0.05	0.08080000
Prps1	5.304170	1.077763e-03	0.11893380	0.03	0.06378277
Rnf128	7.913938	2.378903e-03	0.11630509	0.13	0.09797445
Clasp2	6.186681	1.466243e-03	0.11893520	0.02	0.07497591
Zc4h2	5.498413	8.993527e-04	0.04541577	0.00	0.00000000
Ids	4.685220	1.016225e-03	0.18040119	0.03	0.07392420
Golga4	2.746485	2.197069e-04	0.03969026	0.00	0.00000000
Rab9b	6.636337	2.896632e-03	0.31099505	0.00	0.00000000
Dcaf12l1	5.577477	1.196331e-03	0.12013743	0.00	0.00000000
Snx12	7.413181	2.337589e-03	0.15219800	0.02	0.06930792
Ctdspl	7.123925	1.523635e-03	0.04792493	0.00	0.00000000
Gpd1l	5.039364	1.007809e-03	0.12996050	0.02	0.07900209
Eif1ax	7.766744	2.142236e-03	0.09592919	0.00	0.00000000
Uty	4.725114	1.116354e-03	0.20711286	0.00	0.02762464
Med12	2.527419	2.541794e-04	0.13080190	0.00	0.00000000
