# Supplementary material for: Shape deformation analysis reveals the temporal dynamics of cell-type-specific homeostatic and pathogenic responses to mutant huntingtin
Source: eLife. 2021 Feb 23;10:e64984. doi: 10.7554/eLife.64984 (PMC7901871; doi:10.7554/eLife.64984)
Supplement: Supplementary file 2. — Data are shown for each striatal cell type in Hdh model mice. Top biological annotations (KEGG pathways and gene ontology biological processes upon STRING database analysis; see Materials and methods) are also indicated for each gene deregulation surface cluster and each cell type. [file elife-64984-supp2.xlsx]

## Sheet: Drd2_MSN
Gene name	Gene deregulation surface cluster (centroid)	STRING Network analysis: top 4 non-redundant KEGG pathways, FDR value	STRING network analysis: Top 4 non-redundant GO biological processes, FDR value
Gdap1	0	Circadian rhythm 4.86e-07 Wnt signaling pathway 0.0015 TNF signaling pathway 0.0027 Amphetamine addiction 0.0040	Endosome to lysosome transport 3.83e-10 Exonucleolytic catabolism of deadenylated mRNA 3.12e-09 vesicle-mediated transport 1.09e-08 RNA phosphodiester bond hydrolysis, exonucleolytic 2.40e-08
Brinp3	0
Fam117b	0
D10Wsu102e	0
Tspyl4	0
Cs	0
Usp22	0
Dhx40	0
Csnk1d	0
Hgs	0
Pou6f2	0
Fndc3a	0
Dzip1	0
Dlg1	0
Dnm1l	0
Faim2	0
Vps8	0
Wac	0
Pcdhb2	0
Ctif	0
Cacul1	0
Mvb12b	0
Agps	0
Kpna4	0
Cxxc4	0
Dnajc6	0
Rcan3	0
Mapk10	0
Prickle2	0
Ube3a	0
B4galnt4	0
Aars	0
Elavl3	0
Wdr82	0
Dis3l	0
Uba1	0
Chm	0
Gpkow	0
Foxo4	0
Tbc1d8	1	Dopaminergic synapse 2.99e-19 Adherens junction 1.89e-16 Amphetamine addiction 2.86e-15 Long-term potentiation 7.43e-14	actin cytoskeleton organization 5.02e-16 supramolecular fiber organization 1.75e-11 Ras protein signal transduction 2.90e-11 positive regulation of Arp2/3 complex-mediated actin nucleation 4.24e-10
Gpr6	1
Ccm2	1
Baiap2	1
Ppp1r1b	1
Vrk1	1
Actn2	1
Plk2	1
Slmap	1
Kcnj4	1
Mapk4	1
Ppp1ca	1
Sh3rf2	1
Chn1	1
Pmepa1	1
Ppp3ca	1
Foxo1	1
Penk	1
Slc8a2	1
Hipk4	1
Htr1b	1
Arpp21	1
Slc41a1	2	Hepatocellular carcinoma 1.25e-23 mTOR signaling pathway 1.99e-17 Long-term potentiation 7.21e-17 Thermogenesis 2.80e-16 Neurotrophin signaling pathway 1.04e-13	nucleosome disassembly 2.44e-14 G1/S transition of mitotic cell cycle 2.59e-11 positive regulation of TOR signaling 5.59e-11 nervous system development 1.96e-08
Ric8b	2
Cdk19	2
Cnst	2
Smyd3	2
Srr	2
Osbp2	2
Cdk5r1	2
Camk2b	2
Nfe2l1	2
Calm1	2
Papola	2
Cap2	2
Rnf44	2
Slc24a4	2
Scamp1	2
6030458C11Rik	2
Rbfox1	2
Zhx1	2
Mapk1	2
Clip4	2
Pja2	2
Ldlrad4	2
Mark2	2
Cwc22	2
Sp3	2
Snph	2
Srxn1	2
Ahcyl1	2
Arhgef2	2
Sdc3	2
Rragd	2
Psip1	2
Ncdn	2
Phf24	2
Add1	2
Kazn	2
Rmnd5a	2
Pptc7	2
C3ar1	2
Zfp235	2
Zfp710	2
Map2k7	2
Tfdp1	2
Sh3bgrl2	2
Pias1	2
Tbl1x	2
Smarcc1	2
Arpc2	3	Bacterial invasion of epithelial cells 7.54e-21 Fc gamma R-mediated phagocytosis 2.58e-20 Proteoglycans in cancer 1.04e-17 ErbB signaling pathway 3.57e-14 Long-term potentiation 2.02e-12	positive regulation of actin filament polymerization 1.45e-22 Ras protein signal transduction 3.43e-14 vesicle-mediated transport 6.78e-12 immune system process 1.11e-05
Ckb	3
Cinp	3
Pdcd6	3
Arf4	3
Gpd1	3
Map6d1	3
Copz1	3
Cbx6	3
Sh3gl1	3
Abi1	3
Sdcbp	3
Pdp1	3
Shb	3
Dnajc8	3
Pou3f1	3
Ppp1cb	3
Ccng2	3
Cdk2ap1	3
Cabp1	3
Mkrn1	3
Prkcg	3
Hras	3
C2cd2l	3
Porcn	3
Tspan7	3
Atp1b1	4	Aldosterone-regulated sodium reabsorption 3.05e-18 Thyroid hormone signaling pathway 2.11e-16 cAMP signaling pathway 7.32e-13 Adrenergic signaling in cardiomyocytes 1.81e-12	regulation of sodium ion transmembrane transport 1.92e-15 potassium ion transport 2.13e-13 ATP hydrolysis coupled cation transmembrane transport 1.25e-11 regulation of transmembrane transport 1.22e-08
Epn3	4
Nr2f1	4
Slitrk6	4
Sptssb	4
Tmem25	4
Ube2t	5	Nucleotide excision repair 5.14e-11 TGF-beta signaling pathway 0.00046 Chagas disease (American trypanosomiasis) 0.00094 Fanconi anemia pathway 0.00094 Long-term depression 0.0013	DNA repair 4.56e-12 de novo' protein folding 1.09e-11 cellular response to DNA damage stimulus 3.79e-11 chaperone-mediated protein folding 4.03e-10
Fam174a	5
Clvs2	5
Lrp11	5
Vta1	5
Cct2	5
Kif1bp	5
Otx1	5
Laptm4a	5
Fam216b	5
Fbln1	5
Eif4a2	5
Cct8	5
Ppp2r2b	5
Morn2	5
Bscl2	5
Pdlim1	5
Cd82	5
Anxa5	5
Rad23b	5
Dok7	5
Gars	5
Saraf	5
Syp	5
Syn1	5

## Sheet: Drd1_MSN
Gene name	Gene deregulation surface cluster (centroid)	STRING Network analysis: top 4 non-redundant KEGG pathways, FDR value	STRING network analysis: Top 4 non-redundant GO biological processes, FDR value
Kansl1l	0	FoxO signaling pathway 1.05e-11 Chronic myeloid leukemia 7.38e-10 Cellular senescence 1.45e-08 Hepatocellular carcinoma 9.40e-08	response to growth factor 1.19e-08 SMAD protein complex assembly 1.19e-08 enzyme linked receptor protein signaling pathway 3.14e-08 SMAD protein signal transduction 1.91e-05
Speg	0
Cep350	0
Plxna2	0
Jade2	0
Pla2g3	0
Rapgef6	0
Stat2	0
Dhx33	0
Obscn	0
Map2k6	0
Gga3	0
Dcaf7	0
Mafg	0
Lyst	0
Fbxl21	0
Slc24a4	0
Atxn7	0
Slc39a14	0
Slc25a37	0
Sv2c	0
Cbx5	0
Deptor	0
Srebf2	0
Tnk2	0
Golgb1	0
Opa1	0
Pkd1	0
Abcf1	0
Usf3	0
Birc6	0
Zeb1	0
Wdr33	0
Smad4	0
Eml4	0
Nolc1	0
Dab2ip	0
Klf9	0
Rapgef1	0
Snph	0
Ino80	0
Tm9sf4	0
Noct	0
Jade1	0
Ahcyl1	0
Arhgef2	0
Mttp	0
Prkci	0
Phc3	0
Tgfbr1	0
Slc9a1	0
Phf24	0
Zmym6	0
Usp48	0
Zscan20	0
Adam22	0
Tmem201	0
Ddi2	0
Braf	0
Slc35b4	0
Tpcn1	0
Pptc7	0
Lmtk2	0
Cic	0
Slc6a6	0
Tmcc1	0
Plekha5	0
Etnk1	0
Brsk1	0
Zfp235	0
Kcna1	0
Cacna1c	0
Zfp329	0
Smg1	0
Slco2b1	0
Fam160a2	0
Zfp646	0
Insr	0
Proz	0
N4bp1	0
St3gal2	0
Atmin	0
Pgr	0
Ilf3	0
Tmod2	0
Tfdp2	0
Amt	0
Myo5a	0
Dennd4a	0
Elk1	0
Tbl1x	0
Zmym3	0
Wdr48	0
Tspyl2	0
Lancl1	1	Oxidative phosphorylation 1.18e-34 Retrograde endocannabinoid signaling 1.30e-33 Parkinson's disease 8.74e-33 Thermogenesis 3.84e-29	mitochondrial respiratory chain complex I assembly 1.34e-28 mitochondrion organization 7.50e-15 electron transport chain 4.41e-13 mitochondrial ATP synthesis coupled electron transport 2.16e-10
Cops7b	1
Stx6	1
Rpl31	1
Csnk1g2	1
Hnrnph3	1
Ppa1	1
Ppp2r5a	1
Ackr1	1
Rnd2	1
Rab5c	1
Fn3k	1
Zfp277	1
Ptrh2	1
Cinp	1
Pdcd6	1
Isca1	1
Bag5	1
Wbp4	1
Rabggta	1
Ap1g2	1
Otulin	1
Msra	1
Wdyhv1	1
Adsl	1
Dnal4	1
Igfbp6	1
Nol12	1
Atg101	1
Mcrs1	1
Rps19bp1	1
Ndufb10	1
Rpusd1	1
Tmem138	1
Ehbp1l1	1
Taf7	1
Fkbp2	1
Trim8	1
Arl3	1
Abi1	1
Raly	1
Chtop	1
Mrpl47	1
Cd53	1
Fam110b	1
Dctn3	1
Ddost	1
Ptp4a2	1
Fam76a	1
Ssbp3	1
Ube2k	1
Smim14	1
Capza2	1
Tmed2	1
Rab35	1
Actb	1
Zkscan14	1
Cdk8	1
Mepce	1
Mrps33	1
Gpr12	1
Cnbp	1
Brk1	1
Prkcg	1
Rab7	1
Taf10	1
Bnip3	1
Dnajb1	1
Fkbp8	1
Gsr	1
Ell	1
Rhoa	1
Cdk10	1
Zfp653	1
Gpr45	2	Epstein-Barr virus infection 6.43e-14 Relaxin signaling pathway 2.28e-08 Circadian entrainment 4.13e-08 Cholinergic synapse 1.12e-07 Glutamatergic synapse 1.12e-07	dopamine receptor signaling pathway 8.77e-08 regulation of DNA replication 1.73e-06 G protein-coupled receptor signaling pathway 0.00038 cellular response to stress 0.00082
Polr2a	2
Cbx4	2
Pou6f2	2
Trpc7	2
Chtf18	2
Foxp4	2
Pcdhb19	2
Pcdhb7	2
Pcdhb20	2
Pcdhb17	2
Rgs19	2
Kcng1	2
Gm5148	2
Enpp6	2
Armcx5	2
Kif1a	3	Epstein-Barr virus infection 1.81e-22 NF-kappa B signaling pathway 1.06e-13 Toxoplasmosis 2.09e-09 Hepatitis B 3.11e-09 Herpes simplex infection 8.06e-06 IL-17 signaling pathway 9.39e-06	snRNA processing 1.30e-11 defense response to virus 5.37e-08 regulation of I-kappaB kinase/NF-kappaB signaling 9.93e-08 positive regulation of innate immune response 6.98e-07
Gdap1	3
Trip12	3
Atg4b	3
Uhmk1	3
Mdm4	3
Pign	3
Clasp1	3
Ccar1	3
Enah	3
Polr3b	3
Slc41a2	3
L3mbtl3	3
2610008E11Rik	3
Grb10	3
Ankfy1	3
Jmjd4	3
Usp22	3
Cep68	3
Zfp354c	3
Kpnb1	3
Appbp2	3
Spag9	3
Stat5b	3
Ppp2r5e	3
Traf3	3
Hecw1	3
Daam1	3
Arsb	3
Dcaf5	3
Zfp65	3
Hcn1	3
Xpo7	3
Fndc3a	3
Dgcr2	3
Dnm1l	3
Ehhadh	3
Scaf11	3
Rims2	3
Slc45a4	3
Son	3
Wiz	3
Tulp4	3
Rgmb	3
Lpin2	3
Sos1	3
Dnajc18	3
Atl3	3
Dhx57	3
Pdk1	3
Frmd4a	3
Lrsam1	3
Gapvd1	3
Rif1	3
Man1b1	3
Mvb12b	3
Ralgps1	3
Pomt1	3
Zer1	3
Setx	3
Acp2	3
Myt1	3
Samhd1	3
Chd6	3
Hcn3	3
Slitrk3	3
Zgrf1	3
Usp13	3
Faxc	3
Map3k7	3
Eif4g3	3
Inpp5b	3
E130308A19Rik	3
Hectd3	3
Rcan3	3
Fkbp15	3
Tbc1d1	3
Nsun7	3
Slit2	3
Ssh1	3
Ints1	3
Polr1a	3
Tmem178b	3
Chl1	3
Styk1	3
Wnk1	3
Zfp592	3
Cars	3
Tacc2	3
Usp47	3
Ap3s2	3
Gpatch1	3
Phlpp2	3
Ogfod1	3
Cmtm4	3
Alkbh8	3
Dis3l	3
Atr	3
Rnf123	3
Ppp2r3a	3
Slc36a4	3
Pfkfb4	3
Hdac6	3
Dcx	3
Mecp2	3
Cd99l2	3
Dmd	3
Arl4c	4	Vasopressin-regulated water reabsorption 2.04e-1 Cardiac muscle contraction 5.93e-07 Adrenergic signaling in cardiomyocytes 1.22e-05 cGMP-PKG signaling pathway 0.0016	Translation 1.10e-34 ribosome biogenesis 1.97e-10 organelle assembly4.70e-08 microtubule-based movement 2.89e-07
Ublcp1	4
Epn3	4
Timp2	4
Cacng5	4
Emb	4
Tmtc4	4
Slitrk1	4
Galnt6	4
Mb21d2	4
Sema4g	4
Tanc1	4
Oprl1	4
Sv2a	4
Megf9	4
Tspan33	4
Dync1i1	4
Zyx	4
Nrip2	4
Atp1a3	4
Cacng7	4
Folh1	4
Eif1ax	4
Uty	4
2010300C02Rik	5	Dopaminergic synapse 5.12e-19 cAMP signaling pathway 1.40e-16 mTOR signaling pathway 2.38e-14 Long-term potentiation 5.83e-13 Neurotrophin signaling pathway 2.26e-10 Rap1 signaling pathway 3.45e-07	intracellular signal transduction 5.55e-18 ionotropic glutamate receptor signaling pathway 1.24e-15 cellular response to amino acid stimulus 1.23e-13 circadian regulation of gene expression 1.28e-12 regulation of neuronal synaptic plasticity 3.25e-12 regulation of TOR signaling 3.47e-12
Farp2	5
P4ha1	5
Tbc1d30	5
Rnf112	5
Git1	5
Osbp2	5
Dlg4	5
Per1	5
Camk2b	5
Olfr1393	5
Nr1d1	5
Baiap2	5
Wnk4	5
Ppp1r9b	5
Rab15	5
Stc1	5
Kalrn	5
Mapk4	5
Rin1	5
Mark2	5
Synpo	5
Pcdhb8	5
Sh3rf2	5
Kcnt1	5
Ppp1r16b	5
Rragd	5
Zfyve28	5
Nphp4	5
Kazn	5
Pitpnm2	5
Akt2	5
Slc8a2	5
Smpd3	5
Arhgap10	5
Sntb2	5
Impg1	5
Camkv	5
Stk26	5
Nif3l1	6	Ubiquitin mediated proteolysis 2.67e-14 HTLV-I infection 1.11e-10 Progesterone-mediated oocyte maturation 6.11e-09 Adherens junction 1.06e-06	protein modification by small protein conjugation 1.27e-13 cellular response to DNA damage stimulus 2.21e-07 Golgi vesicle transport 6.39e-07 proteasome-mediated ubiquitin-dependent protein catabolic 1.21e-05
Chst10	6
Pnkd	6
Klhl12	6
Fam117b	6
Rabif	6
Mcu	6
Cr1l	6
Fyn	6
Ptprr	6
Aida	6
Slc35e3	6
Dazap1	6
Tbpl1	6
Rpa1	6
Cs	6
Xpo1	6
Map2k4	6
Vstm2a	6
Ube2z	6
Med24	6
Exoc7	6
Luc7l3	6
Scfd1	6
Sec23a	6
Gtf2a1	6
Wars	6
Exoc2	6
Wdr41	6
Cdip1	6
Trap1	6
Rrm2b	6
Ttll1	6
Mgrn1	6
Dlg1	6
Snx4	6
Racgap1	6
Gga1	6
Kat2b	6
Sod2	6
Ddx39b	6
Stk38	6
Zfp52	6
Rnmt	6
Ehd3	6
Spast	6
Elp2	6
Wac	6
Npc1	6
Ik	6
Lars	6
Tcerg1	6
Hsd17b4	6
Rtn3	6
Gda	6
Pdcl	6
Shoc2	6
Stam	6
Gtf3c5	6
Anapc2	6
Cacul1	6
Arl5a	6
Qsox2	6
Ptpa	6
Marveld1	6
Srsf6	6
H13	6
Sec23b	6
Stx16	6
Ctnnbl1	6
Tti1	6
Pigu	6
Polr3k	6
Snx16	6
Cog6	6
Kpna4	6
Ppid	6
Tgs1	6
Phtf1	6
Pabpc4	6
Dhdds	6
Rad23b	6
Vcp	6
Tesk2	6
Coro1c	6
Nrbp1	6
Ugdh	6
Dck	6
Tbc1d19	6
Cacna2d1	6
Mapk10	6
Usp46	6
Sema4f	6
Grm8	6
Copg2	6
Dhx37	6
Gars	6
Cnpy4	6
Snx10	6
Zfp316	6
Gramd1a	6
Itfg2	6
Lipe	6
Paf1	6
Syn2	6
Zfp248	6
Ccdc91	6
Uba2	6
Zfp9	6
Eif4g2	6
Tmem80	6
Nap1l4	6
Ap3b2	6
Sugp1	6
Rnf170	6
Ash2l	6
Terf2	6
Mtmr7	6
Champ1	6
Pafah1b2	6
Wdr82	6
Abcb10	6
Ptpn9	6
Rnf26	6
Dlg3	6
Ctnnb1	6
Usp11	6
Gpkow	6
Rab39b	6
Pdha1	6
Msl3	6
Zcchc18	6
Nxt2	6
Snx12	6
Gpd1l	6
Rasl10a	7	Fanconi anemia pathway 1.02e-15 Th1 and Th2 cell differentiation 1.11e-07 Cocaine addiction 3.39e-05 HIF-1 signaling pathway 5.86e-05	regulation of kinase activity 1.23e-08 response to stress 1.99e-08 regulation of T cell activation 7.27e-08 DNA repair 1.81e-07
Dusp14	7
Kcnh4	7
Ppp1r1b	7
Rgs14	7
Acvrl1	7
Ppp1r1a	7
Fbxl16	7
Mas1	7
Pcp4	7
Hbegf	7
Lrrc10b	7
Itpka	7
Lmo2	7
Hpca	7
Gabrd	7
Tesc	7
Cd4	7
Hipk4	7
Nrn1l	7
Arpp21	7
Fancb	7
Ppp1r7	8	Spliceosome 1.77e-37 Nucleotide excision repair 1.36e-09 Basal transcription factors 2.20e-08 Apelin signaling pathway 0.0010	mRNA splicing, via spliceosome 3.99e-26 spliceosomal snRNP assembly 1.58e-13 nucleotide-excision repair 1.83e-06 cellular response to DNA damage stimulus 0.00089
Cd55	8
F5	8
Asic4	8
Zfp281	8
AA986860	8
Mknk2	8
Appl2	8
Shc2	8
Angel2	8
Sesn1	8
Smyd3	8
Rnf185	8
Patz1	8
Eif4enif1	8
Nup88	8
Zmiz2	8
Zfp3	8
Pwwp2a	8
Plxdc1	8
Nampt	8
Gna13	8
Cacnb1	8
Eftud2	8
Rfng	8
Ldah	8
Ormdl3	8
E2f6	8
Calm1	8
Papola	8
Otub2	8
Numb	8
Ccnk	8
Nsun2	8
Setd3	8
Eml1	8
Ptgr2	8
Gtf2h2	8
Hmgcr	8
Arhgef3	8
Bap1	8
Dok2	8
Rbfox1	8
Bop1	8
Senp2	8
Dip2b	8
Pphln1	8
Map6d1	8
Poldip3	8
Cbx7	8
Cbx6	8
Cdc5l	8
Zfp523	8
Vps52	8
Gnl1	8
Rhot2	8
Map3k11	8
Fads1	8
Clip4	8
Mllt1	8
Stx3	8
Neurl1a	8
Cnnm1	8
Ralgds	8
Rab14	8
Mapkap1	8
Elmo2	8
Ttpal	8
Tyro3	8
Gzf1	8
Tbc1d20	8
Srxn1	8
Pank2	8
Hdgf	8
Gatb	8
Pip5k1a	8
Atp1a1	8
Isg20l2	8
Nfx1	8
Adgrb2	8
Extl1	8
Zdhhc18	8
Mul1	8
Sdf4	8
Ppp2r2c	8
Ppat	8
Rcc2	8
Tspan12	8
Irf5	8
Ttyh3	8
Mpp6	8
Stk38l	8
Calm3	8
Ing4	8
Zfp60	8
Map3k10	8
Zscan22	8
Numbl	8
Gtf2h1	8
Dusp8	8
Inpp5f	8
Hirip3	8
Sbk1	8
Zfp975	8
Map2k7	8
Ctcf	8
Jph3	8
Cln8	8
Emc8	8
Tmem231	8
Rfwd3	8
Cdkn2aip	8
Vps9d1	8
Srpr	8
C2cd2l	8
Smad3	8
Mras	8
Rab8b	8
Ntm	8
Tomm20	8
Slitrk2	8
Gpr34	8
Uchl5	9	Proteasome 3.50e-44 Epstein-Barr virus infection 8.29e-19 HTLV-I infection 0.0012 Oocyte meiosis 0.0016 Phagosome 0.0099	proteolysis involved in cellular protein catabolic process 1.94e-19 chaperone-mediated protein folding 2.01e-08 regulation of protein stability 1.93e-06 positive regulation of DNA metabolic process 0.00027
Zwint	9
Stx7	9
H2afy2	9
Kif1bp	9
Rab1a	9
Wdpcp	9
Timm22	9
Ywhae	9
Nipsnap1	9
Slc35e4	9
Tada2a	9
Cyb561	9
Eef1e1	9
Hspa2	9
Gmpr2	9
Btf3	9
Trappc13	9
Plpp1	9
Ube2e1	9
Pspc1	9
Zdhhc20	9
Rab2b	9
Cct5	9
Adprh	9
Eif4a2	9
Sec22a	9
Ptp4a3	9
Tubb5	9
Tagln3	9
Ets2	9
Atat1	9
Gap43	9
Slc25a46	9
Ppp2r2b	9
Yif1a	9
Rab18	9
Vim	9
Ppp6c	9
Rbm43	9
Tubb4b	9
Rabepk	9
Tomm34	9
Nphp1	9
Blcap	9
Vps45	9
Ralyl	9
Dmap1	9
Cfap206	9
Stx12	9
Acot7	9
Dnajb6	9
Ppm1g	9
Mrfap1	9
Aurkaip1	9
Asns	9
Nfe2l3	9
Gpr85	9
Capns1	9
Cmas	9
Psmc4	9
Bub3	9
Ufsp2	9
Smad1	9
Zfp358	9
Acat1	9
Idh3a	9
Imp3	9
Nudt16	9
Atp6ap1	9
Morf4l2	9
Syn1	9
Nudt10	9
Nap1l2	9
Dusp12	10	Chronic myeloid leukemia 1.22e-17 Non-small cell lung cancer 4.42e-17 Renal cell carcinoma 4.42e-17 Estrogen signaling pathway 1.36e-16	intracellular signal transduction 3.33e-08 muscle contraction 7.63e-08 small GTPase mediated signal transduction 6.11e-06 Ras protein signal transduction 1.78e-05
Cdk5r2	10
Ube2g2	10
Dusp6	10
Ccm2	10
Nab2	10
Ppm1d	10
Rab40b	10
Plk2	10
Rem2	10
Arc	10
Kcnh3	10
Srf	10
Dusp1	10
Kctd1	10
Cdc42ep3	10
Crem	10
Brms1	10
Slc25a25	10
Frat2	10
Chn1	10
Lpcat4	10
Pmepa1	10
Tmod1	10
Tpm2	10
Shb	10
Dnajc2	10
Ap1s1	10
Nptx2	10
Rasgef1a	10
Erf	10
Hebp1	10
Hras	10
Stard10	10
Ccl25	10
Msmo1	10
Ssbp4	10
Tpm1	10
Spata2l	10
Nrgn	10

## Sheet: Chat_interneurons
Gene name	Gene deregulation surface cluster (centroid)	STRING Network analysis: top 4 non-redundant KEGG pathways, FDR value	STRING network analysis: Top 4 non-redundant GO biological processes, FDR value
Camsap3	0	Ribosome 4.84e-38 RNA transport 8.12e-13 Mismatch repair 1.22e-12 mTOR signaling pathway 7.87e-07	ribosomal small subunit biogenesis 3.25e-18 translational initiation 2.35e-17 DNA repair 2.53e-05 cellular response to DNA damage stimulus 0.00015
Depdc5	0
Dgkq	0
Eif1ax	0
Flii	0
Glra2	0
Hcn3	0
Hk1	0
Inpp5b	0
Mbtps2	0
Msh2	0
Ntng1	0
Tbc1d1	0
Usp47	0
Zfp423	0
Bora	1	Endocytosis 1.80e-05 Terpenoid backbone biosynthesis 3.27e-05 Oocyte meiosis 4.41e-05 Phagosome 0.00025	establishment of protein localization 1.89e-23 vesicle-mediated transport 5.23e-16 endosomal transport 3.87e-08 organelle assembly 6.63e-07
Cdk17	1
Dhrs3	1
Egr4	1
Gadd45b	1
Nip7	1
Nsun5	1
Nucb2	1
Nup35	1
Prmt8	1
Rab40b	1
Rce1	1
Rerg	1
Smim14	1
Syt16	1
Tnfaip8l1	1
Acat1	2	Endometrial cancer 1.02e-07 Hippo signaling pathway 4.60e-06 Gastric cancer 2.26e-05 Wnt signaling pathway 0.00014	chromosome organization 2.66e-12 peptidyl-lysine modification 9.03e-11 Wnt signaling pathway 7.98e-10 stem cell population maintenance 2.11e-09
Adh5	2
Adi1	2
Agk	2
Alg9	2
Alyref2	2
Asns	2
Ctnnb1	2
Dazap1	2
Dctn4	2
Dmap1	2
Echs1	2
Eif2s2	2
Gars	2
Gm5148	2
Kctd8	2
Lancl1	2
Lrp11	2
Lrrc24	2
Mospd1	2
Nipsnap1	2
Paf1	2
Pak4	2
Ppp6c	2
Rab9b	2
Rad21	2
Rint1	2
Scfd1	2
Sec22a	2
Sh3bgrl	2
Shmt2	2
Slc25a46	2
Snx10	2
Snx4	2
Sri	2
Syn2	2
Tada3	2
Tkt	2
Tmem62	2
Tor1aip2	2
Tsg101	2
Uba2	2
Vbp1	2
Vim	2
Zdhhc2	2
Zfp248	2
Zfp90	2
Akt3	3	Neurotrophin signaling pathway 1.52e-15 SNARE interactions in vesicular transport 1.78e-15 Pertussis 7.46e-14 Prolactin signaling pathway 1.64e-12 TNF signaling pathway 2.30e-12	peptidyl-lysine modification 4.08e-16 membrane fusion 9.12e-14 vesicle fusion 9.12e-14 cellular response to stress 5.23e-10 stress-activated protein kinase signaling cascade 7.62e-09
Arhgap26	3
Asrgl1	3
Atf2	3
Atmin	3
Axl	3
Ccny	3
Crebrf	3
Dapk1	3
Dcaf5	3
Dhx57	3
Dpp8	3
Fam117b	3
Fam160a2	3
Fxr2	3
Gpkow	3
Gstcd	3
Ift80	3
Itgam	3
Map2k7	3
Meaf6	3
Napb	3
Nsmaf	3
Pabpc4	3
Ptpn9	3
Rbbp5	3
Rhbdf1	3
Tmcc1	3
Trip4	3
Xpo7	3
Zhx1	3
Ak3	4	Nucleotide excision repair 6.68e-16 Pyrimidine metabolism 3.18e-11 TGF-beta signaling pathway 3.59e-09 Huntington's disease 1.68e-07 Epstein-Barr virus infection 3.37e-07	nucleotide-excision repair 2.16e-13 protein phosphorylation 1.34e-08 DNA repair 1.07e-06 cellular response to stress 3.76e-06 cellular response to DNA damage stimulus 1.60e-05
Arhgef15	4
Atg16l1	4
Caln1	4
Ccnk	4
Cdk5r1	4
Dzip1l	4
E2f6	4
Ercc6	4
Esam	4
Filip1l	4
Fnbp1	4
Glrx2	4
Glul	4
Hirip3	4
Klhl2	4
Ldlrad4	4
Osbp2	4
Pou3f3	4
Ppp2r2c	4
Pptc7	4
Sbk1	4
Sesn1	4
Ski	4
Slc6a8	4
Slco1c1	4
Spns1	4
Tarsl2	4
Tmem231	4
Tmod3	4
Trpc3	4
Tspan12	4
Ttyh3	4
Ube4b	4
Ubp1	4
Ubqln4	4
Arhgap10	5	Regulation of actin cytoskeleton 1.07e-07 Jak-STAT signaling pathway 0.00048 Neurotrophin signaling pathway 0.00099 Axon guidance 0.0042	regulation of Rho protein signal transduction 1.88e-52 positive regulation of GTPase activity 2.34e-35 Ras protein signal transduction 2.91e-08 regulation of cell morphogenesis 1.68e-05
Camk1g	5
Hpca	5
Il20ra	5
Kcnh3	5
Rasgef1a	5
Rem2	5
Rhobtb2	5
Sec14l1	5
Srf	5
Ddit4l	6	mRNA surveillance pathway 4.86e-19 RNA transport 2.28e-12 RNA degradation 1.47e-05	nuclear-transcribed mRNA catabolic process, nonsense-mediated decay 5.07e-15 mRNA metabolic process 6.95e-08 positive regulation of mRNA metabolic process 0.00015 gene silencing by RNA 0.0089

## Sheet: astrocytes
Gene name	Gene deregulation surface cluster (centroid)	STRING Network analysis: top 4 non-redundant KEGG pathways, FDR value	STRING network analysis: Top 4 non-redundant GO biological processes, FDR value
Adam9	0	Fanconi anemia pathway 1.61e-12 Ribosome 1.61e-12 Homologous recombination 8.54e-11 Protein processing in endoplasmic reticulum 3.50e-08	DNA metabolic process 5.75e-18 cellular response to DNA damage stimulus 2.17e-17 organelle organization 7.00e-16 DNA repair 1.80e-15 negative regulation of DNA metabolic process 1.40e-12
Adck5	0
Aida	0
Arntl2	0
Asb13	0
Ash2l	0
Brms1l	0
Cs	0
Dlat	0
Eif1ax	0
Elp2	0
Gars	0
Gca	0
Gpd1l	0
Gtf2a1	0
Hdac7	0
Hsd17b4	0
Hsdl2	0
Ik	0
Kpna4	0
Lrpprc	0
Mapk10	0
Msl3	0
Pdha1	0
Pgd	0
Phtf1	0
Pigq	0
Poldip2	0
Polr2m	0
Rab9b	0
Rad21	0
Rnf128	0
Rpa1	0
Scfd1	0
Sec23a	0
Sec23b	0
Slc25a46	0
Snx12	0
Snx4	0
Sod2	0
Srpk2	0
Stam	0
Terf2	0
Tjp2	0
Twf1	0
Uty	0
Vcp	0
Wars	0
Wdr1	0
Wdr82	0
Wsb1	0
Xrcc5	0
Zfp52	0
Actn4	1	GABAergic synapse 3.40e-17 Cholinergic synapse 3.40e-17 Dopaminergic synapse 7.65e-14 Serotonergic synapse 7.65e-14	histone H3 acetylation 1.52e-14 calcium ion transmembrane transport 3.87e-09 chromatin organization 1.37e-08 regulation of ion transmembrane transport 8.24e-08
Agap3	1
Ankrd10	1
Asic1	1
Bap1	1
C3ar1	1
Cacnb1	1
Cbfa2t3	1
Ctdspl	1
Dbn1	1
E2f6	1
Eif4enif1	1
Epha8	1
Farp2	1
Foxo3	1
Glul	1
Gna13	1
Gnb5	1
Hs2st1	1
Ing4	1
Isg20l2	1
Kat2a	1
Mllt1	1
Osbpl8	1
Papola	1
Pknox2	1
Ppp4r1	1
Rab8b	1
Rasl10b	1
Rhot2	1
Rnf149	1
Sbk1	1
Sesn1	1
Slco1a4	1
Spred1	1
Acat1	2	Oxidative phosphorylation 6.67e-75 Parkinson's disease 5.40e-74 Thermogenesis 2.78e-65 Retrograde endocannabinoid signaling 1.11e-59 Huntington's disease 2.13e-59	mitochondrial respiratory chain complex I assembly 2.84e-41 oxidation-reduction process 1.61e-35 electron transport chain 1.70e-28 mitochondrion organization 8.61e-28
Atp5b	2
Atxn10	2
Aurkaip1	2
Bag1	2
Cbx4	2
Cct4	2
Cct5	2
Dcaf12l1	2
Dctn2	2
Dmap1	2
Dnajc30	2
Dstn	2
Dus3l	2
Evi2a	2
Fabp7	2
Fez1	2
Gpr85	2
Jam3	2
Kif1bp	2
Mrfap1	2
Ndufa8	2
Nfe2l3	2
Nkx2-2	2
Nsun4	2
Pfn2	2
Plagl1	2
Ppp2r2b	2
Ppp6c	2
Prps1	2
Rab1a	2
Smad1	2
Snapin	2
Stx12	2
Tomm34	2
Trappc13	2
Tsg101	2
Ufsp2	2
Uqcrfs1	2
Vps45	2
Vta1	2
Ywhae	2
Zc4h2	2
5730455P16Rik	3	RNA polymerase 5.83e-16 Pyrimidine metabolism 5.23e-11 Thyroid hormone signaling pathway 1.74e-10 Huntington's disease 1.09e-09 Purine metabolism 7.11e-09	DNA-templated transcription, initiation 7.28e-17 snRNA processing 5.64e-15 androgen receptor signaling pathway 5.56e-13 stem cell population maintenance 7.59e-11 RNA processing 1.10e-05
Ahi1	3
Ate1	3
Baz2a	3
Baz2b	3
Ccdc88a	3
Clasp1	3
Cxxc4	3
Daam1	3
Ddx46	3
Enah	3
Flii	3
Hk1	3
Incenp	3
Ints1	3
Itsn2	3
Kif1b	3
Lpin2	3
Med12	3
Nsun7	3
Oprm1	3
Pcdhb16	3
Pcdhb22	3
Phlpp2	3
Polr2a	3
Ppp2r3a	3
Ptpn21	3
Rgmb	3
Sned1	3
Spag9	3
Tet1	3
Vps13a	3
Vwa8	3
Xpo5	3
Zfhx4	3
Abcd2	4	Pyrimidine metabolism 2.08e-19 Cytosolic DNA-sensing pathway 3.31e-19 Epstein-Barr virus infection 2.62e-12 Lysosome 1.99e-07	vesicle-mediated transport 4.61e-15 protein transport 2.49e-09 response to virus 8.64e-07 exocytosis 3.05e-06
Agps	4
Ap1b1	4
Cacul1	4
Ccar1	4
Clasp2	4
Cpsf6	4
Dcaf5	4
Dhx36	4
Dhx57	4
Dlg3	4
Dnajc18	4
Dnm1l	4
Exoc2	4
Hip1r	4
Ids	4
Klf3	4
Lrrtm2	4
Mfn1	4
Msh2	4
Nr3c2	4
Nudt12	4
Phf2	4
Polr3b	4
Pot1a	4
Ppfia2	4
Rabgap1	4
Ralgapa1	4
Rrm2b	4
Scaf11	4
Sema4f	4
Skida1	4
Slitrk5	4
Sos1	4
Stk38	4
Stx16	4
Trim26	4
Uba1	4
Ube3b	4
Vcpip1	4
Zfhx3	4
Zfp65	4
Zfp760	4
Arl3	5	Oxidative phosphorylation 1.79e-80 Parkinson's disease 1.46e-79 Thermogenesis 8.04e-71 Non-alcoholic fatty liver disease (NAFLD) 3.71e-68	mitochondrial respiratory chain complex I assembly 3.56e-44 ATP synthesis coupled electron transport 9.71e-36 cellular respiration 6.94e-35 mitochondrial ATP synthesis coupled electron transport 1.03e-32
Atg101	5
Cfap20	5
Chil1	5
Cinp	5
Crlf2	5
Ctxn1	5
Dctn3	5
Dctpp1	5
Dynll1	5
Eif5a	5
Gmpr	5
Gpr6	5
H2afv	5
H2afx	5
Hsd17b10	5
Igsf8	5
Irak1bp1	5
Mien1	5
Ndufa1	5
Ndufs4	5
Nsun5	5
Nxn	5
Ptms	5
Rhog	5
Adsl	6	Proteasome 2.56e-48 Spliceosome 2.46e-32 Epstein-Barr virus infection 5.19e-15	mRNA splicing, via spliceosome 2.21e-25 ubiquitin-dependent protein catabolic process 3.93e-19 proteasome-mediated ubiquitin-dependent protein catabolic process 6.55e-14 ribonucleoprotein complex biogenesis 6.55e-06
Aldoc	6
Bag4	6
Bnip3	6
Cacnb3	6
Cbx6	6
Dazap2	6
Diablo	6
Ebag9	6
Ehbp1l1	6
Fbxw2	6
Fn3k	6
Ggnbp2	6
Gpsm1	6
Hdgf	6
Hmgcl	6
Lancl1	6
Ldah	6
Msra	6
Pank2	6
Pbx2	6
Phc2	6
Prpf19	6
Psmc1	6
Rab14	6
Rab7	6
Rhoa	6
Rnf34	6
Rundc3a	6
Sbds	6
Srsf2	6
Strn4	6
Ube2v1	6
Ubr7	6
Usp2	6
Usp21	6
Vdac1	6
Wbp4	6
Ybx1	6
Zfp653	6
Ckap4	7	Ubiquitin mediated proteolysis 7.12e-39 GABAergic synapse 1.22e-29 Morphine addiction 1.81e-29 Chemokine signaling pathway 6.86e-28	protein K48-linked ubiquitination 9.74e-23 G protein-coupled receptor signaling pathway 3.60e-15 ubiquitin-dependent protein catabolic process 3.74e-14 cellular response to stimulus 5.98e-08
Fign	7
Herc3	7
Oprl1	7
Tanc1	7
Tmem130	7
Unc5d	7
Abcc1	8	Nucleotide excision repair 7.08e-19 Toll-like receptor signaling pathway 1.91e-13 Osteoclast differentiation 1.91e-12 Chronic myeloid leukemia 4.53e-12 Endocrine resistance 3.04e-11	cellular response to DNA damage stimulus 4.15e-20 cellular response to stress 1.81e-18 nucleotide-excision repair 4.89e-15 regulation of kinase activity 7.09e-14 DNA repair 1.27e-13
Adcy9	8
Aldh1l1	8
Asrgl1	8
Atmin	8
AW549877	8
Cdk7	8
Cep104	8
Cfh	8
Drp2	8
Dusp11	8
Ercc5	8
Ercc6	8
Frmd3	8
Golga4	8
Grm1	8
Jade2	8
Kdm2a	8
Lmtk2	8
Map2k6	8
Map3k12	8
Ndor1	8
Nolc1	8
Nr2e1	8
Pkn2	8
Ptpn11	8
Rab43	8
Rapgef6	8
Rev1	8
Rnf165	8
Shc4	8
Slc35f3	8
Snph	8
Spred2	8
Tab2	8
Tead1	8
Tet3	8
Tfdp1	8
Zkscan3	8
Zmym6	8
