# Supplementary material for: Shape deformation analysis reveals the temporal dynamics of cell-type-specific homeostatic and pathogenic responses to mutant huntingtin
Source: eLife. 2021 Feb 23;10:e64984. doi: 10.7554/eLife.64984 (PMC7901871; doi:10.7554/eLife.64984)
Supplement: Supplementary file 3. — Data are shown for compensatory responses and for pathogenic responses, with indication of the evolution (increased then maintained, increased then reduced, transition) over time. The three columns labeled ‘Information on cellular assignment’ provides the cell type(s) to which gene deregulation in the whole striatum at 6 months is attributed, the weighted distance between whole-striatum and cell-type-specific log-fold-change (LFC) curves, and the false discovery rate (FDR) for the cellular assignments of gene deregulation. The six columns labeled ‘Information on molecular response in Q175 mice’ provide information on the functional effect of shRNA treatment (p-value and rank), the identity number of the gene deregulation surface (GDS) centroid to which the gene belongs, temporal subtype of molecular response, strength of mitigation (if applicable), and maximum deregulation of gene expression across age points. [file elife-64984-supp3.xlsx]

## Sheet: Compensatory-Compensatory
Information on cellular assignment				Information on molecular response in Q175
Gene name	Cell type	Weighted deformation-distance	FDR	P value (shRNA screen): blue, p < 0.05; orange, 0.05<p<=0.1	Rank (shRNA screen)	Gene-deregulation-surface cluster (centroid number)	Temporal subtype	Strength of reduction	Maximum LFC in Q175 mice for the respective cluster centroid
AA986860	Drd1_MSN	7.453	0.07	0.088	1587	8	Increased then reduced	Weakly_reduced	-0.168879
Kcng1	Drd1_MSN	7.585	0	0.012	266	2	Increase & Maintained	NA	0.44552
Angel2	Drd1_MSN	5.961	0.09	0.02	494	8	Increased then reduced	Weakly_reduced	-0.168879
Ap3b2	Drd1_MSN	7.834	0.045	0.003	100	6	Increased then reduced	Weakly_reduced	0.128049
Appl2	Drd1_MSN	7.363	0.058	0.073	1358	8	Increased then reduced	Weakly_reduced	-0.168879
Atg4b	Drd1_MSN	3.693	0.08	0.008	198	3	Increased then reduced	Strongly_reduced	0.147427
Atp1b1	Drd2_MSN	7.311	0.059	0.049	841	4	Increased then reduced	Strongly_reduced	0.473813
Bag4	Astrocyte	7.47	0.065	0.079	1450	1	Increased then reduced	Strongly_reduced	-0.118122
Baz2b	Astrocyte	5.698	0.047	0.016	326	4	Increased then reduced	Strongly_reduced	0.187093
Bora	ChAT_interneuron	6.733	0	0.008	279	1	Increased then reduced	Strongly_reduced	-0.272408
Cacng7	Drd1_MSN	7.97	0	0.006	163	4	Increased then reduced	Strongly_reduced	0.30429
Ccng2	Drd2_MSN	6.95	0.062	0.034	685	3	Increased then reduced	Weakly_reduced	-0.262809
Cdk17	ChAT_interneuron	7.898	0.064	0.089	1611	1	Increased then reduced	Strongly_reduced	-0.272408
Champ1	Drd1_MSN	2.975	0	0.084	1420	6	Increased then reduced	Weakly_reduced	0.128049
Hspa2	Drd1_MSN	8	0	0.074	1259	9	Increase & Maintained	NA	0.152624
Nfe2l3	Drd1_MSN	4.951	0	0.005	146	9	Increase & Maintained	NA	0.152624
Ppp6c	Drd1_MSN	2.802	0.068	0.082	1386	9	Increase & Maintained	NA	0.152624
Ptp4a3	Drd1_MSN	6.259	0.029	0.021	400	9	Increase & Maintained	NA	0.152624
Chil1	Astrocyte	6.003	0.066	0.1	1813	5	Increased then reduced	Strongly_reduced	-0.200515
Clasp1	Astrocyte	5.14	0.058	0.015	310	4	Increased then reduced	Strongly_reduced	0.187093
Clasp1	Drd1_MSN	7.502	0.062	0.015	310	3	Increased then reduced	Strongly_reduced	0.147427
Cnbp	Drd1_MSN	7.691	0.084	0.051	975	1	Increased then reduced	Strongly_reduced	-0.153645
Dazap2	Astrocyte	4.039	0.027	0.057	1082	1	Increased then reduced	Strongly_reduced	-0.118122
Dnajc8	Drd2_MSN	6.836	0.044	0.07	1286	3	Increased then reduced	Weakly_reduced	-0.262809
Faxc	Drd1_MSN	3.938	0.08	0.04	693	3	Increased then reduced	Strongly_reduced	0.147427
Bag1	Astrocyte	7.55	0.07	0.089	1537	6	Increase & Maintained	NA	0.140906
Dctn2	Astrocyte	7.171	0.073	0.066	1112	6	Increase & Maintained	NA	0.140906
Nfe2l3	Astrocyte	6.625	0	0.005	146	6	Increase & Maintained	NA	0.140906
Ppp6c	Astrocyte	5.36	0.078	0.082	1386	6	Increase & Maintained	NA	0.140906
Alyref2	ChAT_interneuron	5.935	0	0.069	1162	2	Increase & Maintained	NA	0.135909
Ppp6c	ChAT_interneuron	1.447	0.069	0.082	1386	2	Increase & Maintained	NA	0.135909
Dlat	Astrocyte	5.976	0.07	0.075	1263	3	Increase & Maintained	NA	0.128945
Frmd4a	Drd1_MSN	5.981	0.082	0.005	143	3	Increased then reduced	Strongly_reduced	0.147427
Gadd45b	ChAT_interneuron	7.129	0.047	0.009	311	1	Increased then reduced	Strongly_reduced	-0.272408
Hectd3	Drd1_MSN	5.213	0.047	0.018	354	3	Increased then reduced	Strongly_reduced	0.147427
Hmgcl	Astrocyte	5.568	0.065	0.057	1080	1	Increased then reduced	Strongly_reduced	-0.118122
Hmgcr	Drd1_MSN	5.538	0	0.094	1698	8	Increased then reduced	Weakly_reduced	-0.168879
Irf5	Drd1_MSN	7.262	0.033	0.036	717	8	Increased then reduced	Weakly_reduced	-0.168879
Laptm4a	Drd2_MSN	7.874	0.023	0.089	1547	5	Increased then reduced	Weakly_reduced	0.163916
Mb21d2	Drd1_MSN	6.47	0	0.001	77	4	Increased then reduced	Strongly_reduced	0.30429
Mkrn1	Drd2_MSN	4.743	0	0.081	1482	3	Increased then reduced	Weakly_reduced	-0.262809
Myt1	Drd1_MSN	6.289	0.063	0.035	611	3	Increased then reduced	Strongly_reduced	0.147427
Ndufb10	Drd1_MSN	4.662	0.046	0.013	366	1	Increased then reduced	Strongly_reduced	-0.153645
Nolc1	Astrocyte	6.9	0	0.009	315	0	Increased then reduced	Weakly_reduced	-0.191351
Nrgn	Drd1_MSN	6.778	0.077	0.002	142	10	Increased then reduced	Weakly_reduced	-0.450777
Nucb2	ChAT_interneuron	5.864	0	0.006	260	1	Increased then reduced	Strongly_reduced	-0.272408
Patz1	Drd1_MSN	7.435	0.068	0.07	1292	8	Increased then reduced	Weakly_reduced	-0.168879
Pbx2	Astrocyte	5.334	0.077	0.086	1563	1	Increased then reduced	Strongly_reduced	-0.118122
Pcdhb22	Astrocyte	6.907	0	0.083	1402	4	Increased then reduced	Strongly_reduced	0.187093
Elk1	Drd1_MSN	6.511	0.069	0.07	1302	0	Increase & Maintained	NA	-0.16185
Golgb1	Drd1_MSN	6.917	0.044	0.084	1534	0	Increase & Maintained	NA	-0.16185
Mafg	Drd1_MSN	7.841	0.065	0.07	1287	0	Increase & Maintained	NA	-0.16185
Nolc1	Drd1_MSN	6.343	0	0.009	315	0	Increase & Maintained	NA	-0.16185
Prkci	Drd1_MSN	7.53	0.026	0.008	285	0	Increase & Maintained	NA	-0.16185
Slc39a14	Drd1_MSN	2.729	0.054	0.087	1568	0	Increase & Maintained	NA	-0.16185
Smg1	Drd1_MSN	6.723	0	0.04	791	0	Increase & Maintained	NA	-0.16185
Tm9sf4	Drd1_MSN	5.881	0	0.019	484	0	Increase & Maintained	NA	-0.16185
Tnk2	Drd1_MSN	6.843	0.056	0.078	1424	0	Increase & Maintained	NA	-0.16185
Zeb1	Drd1_MSN	6.371	0	0.072	1330	0	Increase & Maintained	NA	-0.16185
Pign	Drd1_MSN	5.561	0.099	0.081	1377	3	Increased then reduced	Strongly_reduced	0.147427
Ppfia2	Astrocyte	5.997	0	0.015	306	7	Increased then reduced	Weakly_reduced	0.154467
Rab40b	ChAT_interneuron	4.41	0.025	0.073	1350	1	Increased then reduced	Strongly_reduced	-0.272408
Rab40b	Drd1_MSN	5.831	0.063	0.073	1350	10	Increased then reduced	Weakly_reduced	-0.450777
Rab7	Astrocyte	6.198	0.044	0.05	969	1	Increased then reduced	Strongly_reduced	-0.118122
Rab7	Drd1_MSN	6.07	0.044	0.05	969	1	Increased then reduced	Strongly_reduced	-0.153645
Rab8b	Drd1_MSN	6.478	0.06	0.034	682	8	Increased then reduced	Weakly_reduced	-0.168879
Rab8b	Astrocyte	7.178	0.071	0.034	682	0	Increased then reduced	Weakly_reduced	-0.191351
Ralgds	Drd1_MSN	6.544	0.057	0.04	797	8	Increased then reduced	Weakly_reduced	-0.168879
Rnmt	Drd1_MSN	7.363	0.045	0.033	583	6	Increased then reduced	Weakly_reduced	0.128049
Rragd	Drd2_MSN	6.747	0.069	0.013	368	2	Increased then reduced	Weakly_reduced	-0.209926
Sdf4	Drd1_MSN	3.009	0.045	0.001	97	8	Increased then reduced	Weakly_reduced	-0.168879
Senp2	Drd1_MSN	6.7	0.09	0.058	1087	8	Increased then reduced	Weakly_reduced	-0.168879
Sesn1	Drd1_MSN	7.215	0.067	0.088	1598	8	Increased then reduced	Weakly_reduced	-0.168879
Sesn1	Astrocyte	4.573	0	0.088	1598	0	Increased then reduced	Weakly_reduced	-0.191351
Smim14	Drd1_MSN	3.246	0	0.015	430	1	Increased then reduced	Strongly_reduced	-0.153645
Smim14	ChAT_interneuron	7.885	0.024	0.015	430	1	Increased then reduced	Strongly_reduced	-0.272408
Sod2	Astrocyte	7.26	0	0.044	748	7	Increased then reduced	Weakly_reduced	0.154467
Sod2	Drd1_MSN	3.059	0	0.044	748	6	Increased then reduced	Weakly_reduced	0.128049
Spred1	Astrocyte	7.619	0.049	0.012	360	0	Increased then reduced	Weakly_reduced	-0.191351
Sesn1	ChAT_interneuron	7.438	0.056	0.088	1598	4	Increase & Maintained	NA	-0.212153
Srf	Drd1_MSN	6.248	0	0.069	1278	10	Increased then reduced	Weakly_reduced	-0.450777
Srsf2	Astrocyte	4.284	0.076	0.001	121	1	Increased then reduced	Strongly_reduced	-0.118122
Ssbp3	Drd1_MSN	7.98	0.078	0.022	518	1	Increased then reduced	Strongly_reduced	-0.153645
Stard10	Drd1_MSN	7.15	0	0.001	123	10	Increased then reduced	Weakly_reduced	-0.450777
Stx3	Drd1_MSN	4.755	0.028	0.061	1133	8	Increased then reduced	Weakly_reduced	-0.168879
Tcerg1	Drd1_MSN	6.624	0	0.029	512	6	Increased then reduced	Weakly_reduced	0.128049
Tet1	Astrocyte	6.264	0	0.084	1432	4	Increased then reduced	Strongly_reduced	0.187093
Tspan7	Drd2_MSN	5.584	0.028	0.093	1682	3	Increased then reduced	Weakly_reduced	-0.262809
Uba1	Drd2_MSN	3.16	0.095	0.016	325	0	Increased then reduced	Weakly_reduced	0.195889
Uba1	Astrocyte	5.378	0.08	0.016	325	7	Increased then reduced	Weakly_reduced	0.154467
Ublcp1	Drd1_MSN	7.44	0.054	0.099	1717	4	Increased then reduced	Strongly_reduced	0.30429
Vps52	Drd1_MSN	5.6	0	0.068	1252	8	Increased then reduced	Weakly_reduced	-0.168879
Vps9d1	Drd1_MSN	2.752	0.09	0.067	1243	8	Increased then reduced	Weakly_reduced	-0.168879
Wdr41	Drd1_MSN	2.5	0.027	0.09	1551	6	Increased then reduced	Weakly_reduced	0.128049
Ppp1r16b	Drd1_MSN	6.302	0	0.033	678	5	Increase & Maintained	NA	-0.471829
Rragd	Drd1_MSN	7.019	0.032	0.013	368	5	Increase & Maintained	NA	-0.471829
Il20ra	ChAT_interneuron	7.198	0	0.062	1153	5	Increase & Maintained	NA	-0.54502
Srf	ChAT_interneuron	6.671	0	0.069	1278	5	Increase & Maintained	NA	-0.54502
Foxo1	Drd2_MSN	7.028	0	0.004	217	1	Increase & Maintained	NA	-0.658003
Ppp1ca	Drd2_MSN	7.012	0	0.018	464	1	Increase & Maintained	NA	-0.658003

## Sheet: Pathogenic-Pathogenic 
Information on cellular assignment				Information on molecurlar response in Q175 mice
Gene name	Cell type	Weighted deformation-distance	FDR	P value (shRNA screen): blue, p < 0.05; orange, 0.05<p<=0.1	Rank (shRNA screen)	Gene-deregulation-surface cluster (centroid number)	Temporal subtype	Strength of mitigation	maximum LFC in Q175 mice for the respective cluster centroid
Chtf18	Drd1_MSN	5.867	0.03	0.075	1381	2	Increase & Maintained	NA	0.44552
Sv2a	Drd1_MSN	6.626	0.08	0	53	4	Mitigated	Strongly_mitigated	0.30429
Emb	Drd1_MSN	6.529	0.057	0.078	1425	4	Mitigated	Strongly_mitigated	0.30429
Camsap3	ChAT_interneuron	7.019	0	0.004	201	0	Mitigated	Strongly_mitigated	0.225411
Aars	Drd2_MSN	7.655	0.072	0.009	306	0	Mitigated	Weakly_mitigated	0.195889
Dnm1l	Drd2_MSN	4.291	0.095	0.044	855	0	Mitigated	Weakly_mitigated	0.195889
Mvb12b	Drd2_MSN	7.675	0	0.061	1145	0	Mitigated	Weakly_mitigated	0.195889
Fndc3a	Drd2_MSN	7.108	0.067	0.08	1457	0	Mitigated	Weakly_mitigated	0.195889
Dhx40	Drd2_MSN	7.952	0.051	0.097	1759	0	Mitigated	Weakly_mitigated	0.195889
Oprm1	Astrocyte	7.942	0	0.03	643	4	Mitigated	Strongly_mitigated	0.187093
Daam1	Astrocyte	2.831	0.097	0.045	875	4	Mitigated	Strongly_mitigated	0.187093
Phlpp2	Astrocyte	7.417	0	0.047	903	4	Mitigated	Strongly_mitigated	0.187093
Med12	Astrocyte	2.527	0	0.099	1797	4	Mitigated	Strongly_mitigated	0.187093
Bscl2	Drd2_MSN	5.944	0.081	0.025	549	5	Mitigated	Weakly_mitigated	0.163916
Kif1bp	Drd2_MSN	6.451	0.033	0.057	1066	5	Mitigated	Weakly_mitigated	0.163916
Syp	Drd2_MSN	4.923	0	0.098	1779	5	Mitigated	Weakly_mitigated	0.163916
Pcdhb16	Astrocyte	5.205	0.081	0	78	7	Mitigated	Weakly_mitigated	0.154467
Dnm1l	Astrocyte	7.283	0	0.044	855	7	Mitigated	Weakly_mitigated	0.154467
Zfp52	Astrocyte	6.612	0.065	0.051	976	7	Mitigated	Weakly_mitigated	0.154467
Stk38	Astrocyte	6.045	0.065	0.056	1055	7	Mitigated	Weakly_mitigated	0.154467
Vim	Drd1_MSN	6.547	0	0.027	585	9	Increase & Maintained	NA	0.152624
Cmas	Drd1_MSN	3.593	0.1	0.027	589	9	Increase & Maintained	NA	0.152624
Timm22	Drd1_MSN	7.518	0.09	0.031	649	9	Increase & Maintained	NA	0.152624
Ube2e1	Drd1_MSN	5.184	0.045	0.037	741	9	Increase & Maintained	NA	0.152624
Kif1bp	Drd1_MSN	5.621	0	0.057	1066	9	Increase & Maintained	NA	0.152624
Trappc13	Drd1_MSN	5.942	0.045	0.068	1251	9	Increase & Maintained	NA	0.152624
Pspc1	Drd1_MSN	5.349	0.03	0.069	1280	9	Increase & Maintained	NA	0.152624
Cct5	Drd1_MSN	7.944	0.047	0.074	1369	9	Increase & Maintained	NA	0.152624
Adprh	Drd1_MSN	4.16	0.069	0.09	1625	9	Increase & Maintained	NA	0.152624
Yif1a	Drd1_MSN	7.501	0.08	0.091	1648	9	Increase & Maintained	NA	0.152624
Zfp358	Drd1_MSN	6.406	0.077	0.091	1649	9	Increase & Maintained	NA	0.152624
Man1b1	Drd1_MSN	7.752	0.045	0.006	242	3	Mitigated	Strongly_mitigated	0.147427
Wiz	Drd1_MSN	7.675	0.094	0.007	276	3	Mitigated	Strongly_mitigated	0.147427
Hecw1	Drd1_MSN	7.332	0.046	0.03	633	3	Mitigated	Strongly_mitigated	0.147427
Rnf123	Drd1_MSN	7.944	0.055	0.033	675	3	Mitigated	Strongly_mitigated	0.147427
Pomt1	Drd1_MSN	4.499	0	0.039	783	3	Mitigated	Strongly_mitigated	0.147427
Dnm1l	Drd1_MSN	5.204	0.088	0.044	855	3	Mitigated	Strongly_mitigated	0.147427
Kif1a	Drd1_MSN	7.284	0.033	0.044	857	3	Mitigated	Strongly_mitigated	0.147427
Daam1	Drd1_MSN	5.111	0.09	0.045	875	3	Mitigated	Strongly_mitigated	0.147427
Phlpp2	Drd1_MSN	6.002	0	0.047	903	3	Mitigated	Strongly_mitigated	0.147427
Zgrf1	Drd1_MSN	6.454	0.031	0.053	1007	3	Mitigated	Strongly_mitigated	0.147427
Mvb12b	Drd1_MSN	6.329	0.059	0.061	1145	3	Mitigated	Strongly_mitigated	0.147427
Fndc3a	Drd1_MSN	7.006	0.032	0.08	1457	3	Mitigated	Strongly_mitigated	0.147427
Stat5b	Drd1_MSN	7.845	0	0.081	1478	3	Mitigated	Strongly_mitigated	0.147427
Cct4	Astrocyte	6.443	0.099	0.033	672	6	Increase & Maintained	NA	0.140906
Kif1bp	Astrocyte	6.355	0	0.057	1066	6	Increase & Maintained	NA	0.140906
Trappc13	Astrocyte	4.727	0.034	0.068	1251	6	Increase & Maintained	NA	0.140906
Cct5	Astrocyte	7.067	0.071	0.074	1369	6	Increase & Maintained	NA	0.140906
Kctd8	ChAT_interneuron	7.271	0.03	0.012	357	2	Increase & Maintained	NA	0.135909
Snx10	ChAT_interneuron	6.584	0	0.02	489	2	Increase & Maintained	NA	0.135909
Vim	ChAT_interneuron	7.169	0	0.027	585	2	Increase & Maintained	NA	0.135909
Adh5	ChAT_interneuron	7.448	0	0.08	1472	2	Increase & Maintained	NA	0.135909
Msl3	Astrocyte	6.902	0.081	0.002	144	3	Increase & Maintained	NA	0.128945
Sec23b	Astrocyte	5.088	0.096	0.038	766	3	Increase & Maintained	NA	0.128945
Brms1l	Astrocyte	5.218	0.084	0.074	1372	3	Increase & Maintained	NA	0.128945
Plagl1	Astrocyte	7.05	0.088	0.096	1753	3	Increase & Maintained	NA	0.128945
Msl3	Drd1_MSN	7.248	0.086	0.002	144	6	Mitigated	Weakly_mitigated	0.128049
Rnf26	Drd1_MSN	4.267	0	0.007	261	6	Mitigated	Weakly_mitigated	0.128049
Pnkd	Drd1_MSN	7.055	0.062	0.018	459	6	Mitigated	Weakly_mitigated	0.128049
Snx10	Drd1_MSN	3.945	0.081	0.02	489	6	Mitigated	Weakly_mitigated	0.128049
Chst10	Drd1_MSN	5.438	0.091	0.032	662	6	Mitigated	Weakly_mitigated	0.128049
Dhx37	Drd1_MSN	6.404	0.029	0.035	706	6	Mitigated	Weakly_mitigated	0.128049
Sec23b	Drd1_MSN	5.352	0.082	0.038	766	6	Mitigated	Weakly_mitigated	0.128049
Ptpn9	Drd1_MSN	3.656	0	0.039	785	6	Mitigated	Weakly_mitigated	0.128049
Zfp52	Drd1_MSN	7.531	0	0.051	976	6	Mitigated	Weakly_mitigated	0.128049
Eif4g2	Drd1_MSN	5.09	0	0.052	989	6	Mitigated	Weakly_mitigated	0.128049
Stk38	Drd1_MSN	6.168	0	0.056	1055	6	Mitigated	Weakly_mitigated	0.128049
Zcchc18	Drd1_MSN	2.394	0.093	0.058	1095	6	Mitigated	Weakly_mitigated	0.128049
Xpo1	Drd1_MSN	2.665	0.09	0.079	1449	6	Mitigated	Weakly_mitigated	0.128049
Strn4	Astrocyte	6.745	0.099	0.058	985	1	Mitigated	Strongly_mitigated	-0.118122
Ybx1	Astrocyte	6.368	0.045	0.067	1134	1	Mitigated	Strongly_mitigated	-0.118122
Usp21	Astrocyte	2.854	0	0.089	1542	1	Mitigated	Strongly_mitigated	-0.118122
Rpusd1	Drd1_MSN	5.064	0.081	0.034	603	1	Mitigated	Strongly_mitigated	-0.153645
Nol12	Drd1_MSN	4.335	0.099	0.079	1338	1	Mitigated	Strongly_mitigated	-0.153645
Mepce	Drd1_MSN	7.133	0.032	0.082	1393	1	Mitigated	Strongly_mitigated	-0.153645
Ddost	Drd1_MSN	6.847	0.029	0.091	1580	1	Mitigated	Strongly_mitigated	-0.153645
Proz	Drd1_MSN	7.178	0.077	0.03	533	0	Increase & Maintained	NA	-0.16185
Dcaf7	Drd1_MSN	4.581	0.045	0.053	903	0	Increase & Maintained	NA	-0.16185
Smad4	Drd1_MSN	6.311	0.099	0.083	1408	0	Increase & Maintained	NA	-0.16185
N4bp1	Drd1_MSN	7.271	0.074	0.083	1418	0	Increase & Maintained	NA	-0.16185
Noct	Drd1_MSN	4.738	0.089	0.093	1611	0	Increase & Maintained	NA	-0.16185
Mllt1	Drd1_MSN	3.705	0.047	0.007	176	8	Mitigated	Weakly_mitigated	-0.168879
Smad3	Drd1_MSN	6.797	0	0.007	177	8	Mitigated	Weakly_mitigated	-0.168879
Stk38l	Drd1_MSN	6.336	0	0.017	333	8	Mitigated	Weakly_mitigated	-0.168879
Map3k10	Drd1_MSN	5.978	0.094	0.021	403	8	Mitigated	Weakly_mitigated	-0.168879
Extl1	Drd1_MSN	4.255	0.05	0.021	408	8	Mitigated	Weakly_mitigated	-0.168879
E2f6	Drd1_MSN	5.141	0	0.03	525	8	Mitigated	Weakly_mitigated	-0.168879
Sbk1	Drd1_MSN	7.705	0.073	0.053	890	8	Mitigated	Weakly_mitigated	-0.168879
Hirip3	Drd1_MSN	6.605	0.09	0.066	1107	8	Mitigated	Weakly_mitigated	-0.168879
Zmiz2	Drd1_MSN	7.225	0	0.084	1425	8	Mitigated	Weakly_mitigated	-0.168879
Numbl	Drd1_MSN	7.862	0.057	0.086	1475	8	Mitigated	Weakly_mitigated	-0.168879
Gtf2h1	Drd1_MSN	7.01	0.029	0.091	1583	8	Mitigated	Weakly_mitigated	-0.168879
Ldah	Drd1_MSN	7.102	0.094	0.093	1607	8	Mitigated	Weakly_mitigated	-0.168879
Mllt1	Astrocyte	5.691	0	0.007	176	0	Mitigated	Weakly_mitigated	-0.191351
E2f6	Astrocyte	6.172	0	0.03	525	0	Mitigated	Weakly_mitigated	-0.191351
Farp2	Astrocyte	3.986	0.061	0.051	862	0	Mitigated	Weakly_mitigated	-0.191351
Sbk1	Astrocyte	5.686	0.031	0.053	890	0	Mitigated	Weakly_mitigated	-0.191351
C3ar1	Astrocyte	7.499	0.045	0.064	1080	0	Mitigated	Weakly_mitigated	-0.191351
Ldah	Astrocyte	4.137	0.094	0.093	1607	0	Mitigated	Weakly_mitigated	-0.191351
Ndufs4	Astrocyte	7.616	0.073	0.026	465	5	Mitigated	Strongly_mitigated	-0.200515
Dctpp1	Astrocyte	7.411	0.057	0.033	581	5	Mitigated	Strongly_mitigated	-0.200515
H2afv	Astrocyte	2.604	0.054	0.075	1272	5	Mitigated	Strongly_mitigated	-0.200515
Cdk19	Drd2_MSN	5.025	0	0.004	132	2	Mitigated	Weakly_mitigated	-0.209926
Rmnd5a	Drd2_MSN	6.516	0.06	0.042	720	2	Mitigated	Weakly_mitigated	-0.209926
Mapk1	Drd2_MSN	4.679	0.068	0.048	817	2	Mitigated	Weakly_mitigated	-0.209926
C3ar1	Drd2_MSN	7.653	0	0.064	1080	2	Mitigated	Weakly_mitigated	-0.209926
6030458C11Rik	Drd2_MSN	5.885	0.07	0.066	1109	2	Mitigated	Weakly_mitigated	-0.209926
E2f6	ChAT_interneuron	7.541	0	0.03	525	4	Increase & Maintained	NA	-0.212153
Sbk1	ChAT_interneuron	7.905	0.027	0.053	890	4	Increase & Maintained	NA	-0.212153
Hirip3	ChAT_interneuron	7.815	0.06	0.066	1107	4	Increase & Maintained	NA	-0.212153
Atg16l1	ChAT_interneuron	7.135	0	0.082	1392	4	Increase & Maintained	NA	-0.212153
Shb	Drd2_MSN	6.027	0.08	0.008	205	3	Mitigated	Weakly_mitigated	-0.262809
Porcn	Drd2_MSN	7.593	0.065	0.029	517	3	Mitigated	Weakly_mitigated	-0.262809
Nup35	ChAT_interneuron	7.257	0	0.04	689	1	Mitigated	Strongly_mitigated	-0.272408
Tnfaip8l1	ChAT_interneuron	6.993	0.076	0.065	1089	1	Mitigated	Strongly_mitigated	-0.272408
Shb	Drd1_MSN	5.33	0.063	0.008	205	10	Mitigated	Weakly_mitigated	-0.450777
Msmo1	Drd1_MSN	6.206	0.029	0.016	317	10	Mitigated	Weakly_mitigated	-0.450777
Cdk5r2	Drd1_MSN	7.748	0	0.018	353	10	Mitigated	Weakly_mitigated	-0.450777
Tmod1	Drd1_MSN	6.068	0.098	0.04	692	10	Mitigated	Weakly_mitigated	-0.450777
Ssbp4	Drd1_MSN	5.488	0	0.044	752	10	Mitigated	Weakly_mitigated	-0.450777
Ube2g2	Drd1_MSN	5.541	0	0.059	999	10	Mitigated	Weakly_mitigated	-0.450777
Plk2	Drd1_MSN	4.61	0	0.061	1033	10	Mitigated	Weakly_mitigated	-0.450777
Ccl25	Drd1_MSN	3.644	0	0.069	1179	10	Mitigated	Weakly_mitigated	-0.450777
Git1	Drd1_MSN	5.963	0.023	0.029	510	5	Increase & Maintained	NA	-0.471829
Farp2	Drd1_MSN	7.685	0.054	0.051	862	5	Increase & Maintained	NA	-0.471829
Tbc1d30	Drd1_MSN	6.409	0	0.087	1497	5	Increase & Maintained	NA	-0.471829
Hpca	ChAT_interneuron	6.928	0	0.066	1110	5	Increase & Maintained	NA	-0.54502
Htr1b	Drd2_MSN	6.159	0	0.026	474	1	Increase & Maintained	NA	-0.658003
Plk2	Drd2_MSN	5.778	0	0.061	1033	1	Increase & Maintained	NA	-0.658003
Penk	Drd2_MSN	6.847	0	0.098	1694	1	Increase & Maintained	NA	-0.658003
Kcnh4	Drd1_MSN	7.649	0	0.058	981	7	Mitigated	Weakly_mitigated	-0.851374
Hpca	Drd1_MSN	5.385	0	0.066	1110	7	Mitigated	Weakly_mitigated	-0.851374
Ppp1r1a	Drd1_MSN	6.059	0.029	0.078	1327	7	Mitigated	Weakly_mitigated	-0.851374

## Sheet: P-to-C & C
Information on cellular assignment				Information on molecular response in Q175 mice
Gene name	Cell type	Weighted deformation-distance	FDR	P value (shRNA screen): blue, p < 0.05; orange, 0.05<p<=0.1	Rank (shRNA screen)	Gene-deregulation-surface cluster (centroid number)	Temporal subtype	maximum LFC in Q175 mice for the respective cluster centroid
Tet3	Astrocyte	7.547	0.084	0.051	981	8	P-to-C & Maintained	-0.13673
Golga4	Astrocyte	2.746	0	0.074	1364	8	P-to-C & Maintained	-0.13673

## Sheet: C-to-P & P
Information on cellular assignment				Information on molecular response in Q175 mice
Gene name	Cell type	Weighted deformation-distance	FDR	P value (shRNA screen): blue, p < 0.05; orange, 0.05<p<=0.1	Rank (shRNA screen)	Gene-deregulation-surface cluster (centroid number)	Temporal subtype	maximum LFC in Q175 mice for the respective cluster centroid
Cfh	Astrocyte	7.645	0	0.087	1502	8	Compensatory-to-Pathogenic (C-to-P), then Maintained	-0.13673

## Sheet: No response
Information on cellular assignment				Information on molecular response in Q175 mice
Gene name	Cell type	Weighted deformation-distance	FDR	P value (shRNA screen): blue, p < 0.05; orange, 0.05<p<=0.1	Rank (shRNA screen)	Gene-deregulation-surface cluster (centroid number)	Temporal subtype	maximum LFC in Q175 mice for the respective cluster centroid
Rbbp5	ChAT_interneuron	5.246	0.045	0.005	149	3	Not applicable	0.0459213
Ccny	ChAT_interneuron	7.934	0.06	0.031	651	3	Not applicable	0.0459213
Ptpn9	ChAT_interneuron	7.808	0	0.039	785	3	Not applicable	0.0459213
Atf2	ChAT_interneuron	6.202	0.084	0.063	1174	3	Not applicable	0.0459213
Dapk1	ChAT_interneuron	6.392	0	0.064	1188	3	Not applicable	0.0459213
